# Supplementary material for: Exploring the Mycovirus Universe: Identification, Diversity, and Biotechnological Applications
Source: MDPI journal article supplement (doi:10.3390/jof9030361), 2023-03-15
Supplement: s1 [file s1]

# SUPPLEMENTARY INFORMATION

## Exploring the mycovirus universe: Identification, Diversity, and Biotechnological Applications

Diana Carolina Villan Larios<sup>1</sup>; Brayan Maudiel Diaz Reyes<sup>1</sup>; Carlos Priminho Pirovani<sup>1</sup>; Leandro Lopes Loguercio<sup>1</sup>; Vinícius Castro Santos<sup>2</sup>; Aristóteles Góes-Neto<sup>4</sup>; Paula Luize Camargos Fonseca<sup>3,\*</sup>; Eric Roberto Guimarães Rocha Aguiar<sup>1,\*</sup>

<sup>1</sup> Department of Biological Sciences, Universidade Estadual de Santa Cruz, Ilhéus, Bahia, CEP 45662900, Brazil; [carolarios.312@gmail.com](mailto:carolarios.312@gmail.com); [1994bmaudiel@gmail.com](mailto:1994bmaudiel@gmail.com); [pirovanicp@gmail.com](mailto:pirovanicp@gmail.com); [leandro@uesc.br](mailto:leandro@uesc.br); [ericgdp@gmail.com](mailto:ericgdp@gmail.com);

<sup>2</sup> Department of Biochemistry and Immunology, Instituto de Ciências Biológicas, Universidade Federal de Minas Gerais, Belo Horizonte, Minas Gerais, CEP 30270-901, Brazil; [vini8cs@gmail.com](mailto:vini8cs@gmail.com)

<sup>3</sup> Department of Genetics, Instituto de Ciências Biológicas, Universidade Federal de Minas Gerais, Belo Horizonte, Minas Gerais, CEP 30270-901, Brazil; [camargos.paulaluize@gmail.com](mailto:camargos.paulaluize@gmail.com)

<sup>4</sup> Department of Microbiology, Instituto de Ciências Biológicas, Universidade Federal de Minas Gerais, Belo Horizonte, Minas Gerais, CEP 30270-901, Brazil; [arigoesneto@gmail.com](mailto:arigoesneto@gmail.com)

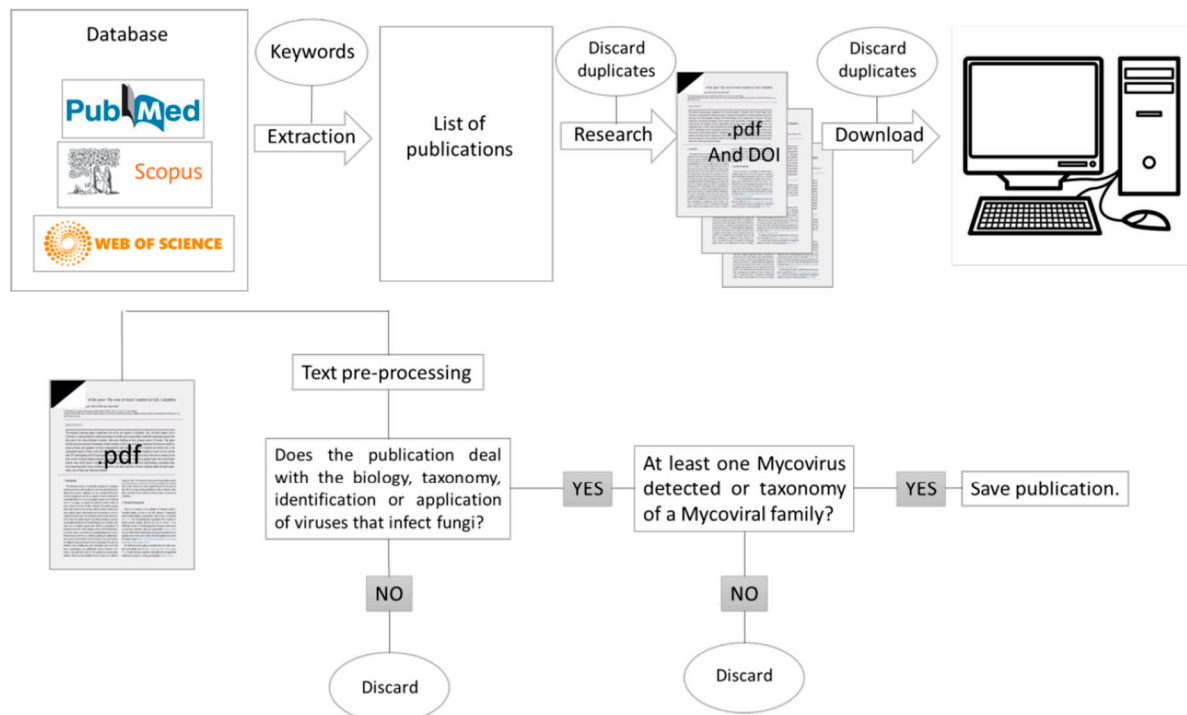

**Supplementary Figure S1.** Workflow for data acquisition. The databases with keywords (mycovirus and fungal viruses) were consulted to extract a list of publications, in which title and abstract were considered, and duplicates discarded. The papers were classified by groups (publications dealing with the biology, taxonomy, identification, and application of mycovirus, and including at least one mycoviral family or species) those that did not meet the criteria were discarded.

**Supplementary Table S1.** Classification of viruses that infect fungi, based on Report of ICTV (May, 2021), ICTV on line.

| Virus          |                   | Fungus                                                                                                                                                                |                  |        | Fungos |                                                                                                          |                   |                       |                                                                                                                                                       |         |               |                 |                  |
|----------------|-------------------|-----------------------------------------------------------------------------------------------------------------------------------------------------------------------|------------------|--------|--------|----------------------------------------------------------------------------------------------------------|-------------------|-----------------------|-------------------------------------------------------------------------------------------------------------------------------------------------------|---------|---------------|-----------------|------------------|
| Family         | Genus             | Name                                                                                                                                                                  | Size             | Genome | Year   | Host                                                                                                     | Family            | Genus                 | NCBI                                                                                                                                                  | Kingdom | Filo          | Class           | Order            |
| Partitiviridae | Alphapartitivirus | <i>Chondrostereum purpureum cryptic virus 1</i>                                                                                                                       | 1920 nt          | dsRNA  | 2013   | <i>Chondrostereum purpureum</i>                                                                          | Meruliaceae       | <i>Chondrostereum</i> | <a href="#">NC_038915</a>                                                                                                                             | FUNGI   | Basidiomycota | Agaricomycetes  | Polyporales      |
|                |                   | <i>Flammulina velutipes browning virus</i>                                                                                                                            | 1915 nt          | dsRNA  | 2013   | <i>Flammulina Velutipes</i>                                                                              | Physalacriaceae   | <i>Flammulina</i>     | <a href="#">AB465308</a>                                                                                                                              | FUNGI   | Basidiomycota | Agaricomycetes  | Agaricales       |
|                |                   | <i>Helicobasidium mompa partitivirus V70</i>                                                                                                                          | 1928 nt          | dsRNA  | 2005   | <i>Helicobasidium mompa</i>                                                                              | Platyglomeae      | <i>Helicobasidium</i> | <a href="#">NC_043392</a>                                                                                                                             | FUNGI   | Basidiomycota | Pucciniomycetes | Helicobasidiales |
|                |                   | <i>Heterobasidium partitivirus 1, Heterobasidium partitivirus 3, Heterobasidium partitivirus 12, Heterobasidium partitivirus 13, y Heterobasidium partitivirus 15</i> | 1791 nt          | dsRNA  | 2015   | <i>Heterobasidium sp., Heterobasidium ecrustosum, Heterobasidium annosum, Heterobasidium parviporum.</i> | Bondarzewiaceae   | <i>Heterobasidium</i> | <a href="#">NC_038827</a> ,<br><a href="#">NC_038835</a> ,<br><a href="#">NC_038829</a> ,<br><a href="#">NC_038831</a> ,<br><a href="#">NC_038833</a> | FUNGI   | Basidiomycota | Agaricomycetes  | Russulales       |
|                |                   | <i>Rosellinia necatrix partitivirus 2</i>                                                                                                                             | 1985 nt          | dsRNA  | 2013   | <i>rosellinia necatrix</i>                                                                               | Xylariaceae       | <i>Rosellinia</i>     | <a href="#">NC_020234</a>                                                                                                                             | FUNGI   | Ascomycota    | Sordariomycetes | Xylariales       |
| Partitiviridae | Betapartitivirus  | <i>Virus atkinsonella hypoxylon</i>                                                                                                                                   | 2180 nt          | dsRNA  | 1999   | <i>Atkinsonella hypoxylon</i>                                                                            | Clavicipitaceae   | <i>Atkinsonella</i>   | <a href="#">NC_003470</a>                                                                                                                             | FUNGI   | Ascomycota    | Sordariomycetes | Hypocreales      |
|                |                   | <i>Ceratocystis resinifera virus 1</i>                                                                                                                                | 2207 nt          | dsRNA  | 2009   | <i>Endoconidiophora resinifera</i>                                                                       | Ceratocystidaceae | <i>Ceratocystis</i>   | <a href="#">NC_010755</a>                                                                                                                             | FUNGI   | Ascomycota    | Sordariomycetes | Microascales     |
|                |                   | <i>Virus fusarium poae 1</i>                                                                                                                                          | 2231 nt          | dsRNA  | 2002   | <i>Fusarium poae</i>                                                                                     | Nectriaceae       | <i>Fusarium</i>       | <a href="#">NC_030877</a>                                                                                                                             | FUNGI   | Ascomycota    | Sordariomycetes | Hypocreales      |
|                |                   | <i>Virus pleurotus ostratus 1</i>                                                                                                                                     | 2223 nt          | dsRNA  | 2009   | <i>pleurotus ostreatus</i>                                                                               | Pleurotaceae      | <i>Pleurotus</i>      | <a href="#">NC_006960</a>                                                                                                                             | FUNGI   | Basidiomycota | Agaricomycetes  | Agaricales       |
|                |                   | <i>Heterobasidium partivirus 2, Heterobasidium partivirus 7, Heterobasidium partivirus 8 y Heterobasidium partivirus P</i>                                            | 2281 nt, 2375 nt | dsRNA  | 2005   | <i>Heterobasidium sp.,</i>                                                                               | Bondarzewiaceae   | <i>Heterobasidium</i> | <a href="#">NC_038839</a> ,<br><a href="#">NC_035485</a> ,<br><a href="#">NC_038841</a> ,<br><a href="#">NC_043393</a>                                | FUNGI   | Basidiomycota | Agaricomycetes  | Russulales       |
| Partitiviridae | Gammaherpesvirus  | <i>Rosellinia necatrix virus 1-w8</i>                                                                                                                                 | 2279 nt          | dsRNA  | 2005   | <i>Rosellinia necatrix</i>                                                                               | Xylariaceae       | <i>Rosellinia</i>     | <a href="#">NC_007538</a>                                                                                                                             | FUNGI   | Ascomycota    | Sordariomycetes | Xylariales       |
|                |                   | <i>Rhizoctonia solani virus 717</i>                                                                                                                                   | 2206 nt          | dsRNA  | 1991   | <i>Rhizoctonia solani</i>                                                                                | Agonomycetaceae   | <i>Rhizoctonia</i>    | <a href="#">NC_003802</a>                                                                                                                             | FUNGI   | Basidiomycota | Agaricomycetes  | Cantharellales   |
|                |                   | <i>Virus de aspergillus ochraceus</i>                                                                                                                                 | 1220 nt          | dsRNA  | 1991   | <i>Aspergillus ochraceus</i>                                                                             | Trichocomaceae    | <i>Aspergillus</i>    | <a href="#">NC_043395</a>                                                                                                                             | FUNGI   | Ascomycota    | Eurotiomycetes  | Eurotiales       |
|                |                   | <i>Virus discula destructiva 1 y Virus discula destructiva 2</i>                                                                                                      | 1787 nt          | dsRNA  | 2005   | <i>Discula destructiva</i>                                                                               | Valseaceae        | <i>Discula</i>        | <a href="#">NC_002797</a>                                                                                                                             | FUNGI   | Ascomycota    | Sordariomycetes | Diaporthales     |
|                |                   | <i>Fusarium solani virus 1</i>                                                                                                                                        | 1645 nt          | dsRNA  | 2002   | <i>Fusarium solani, haematococca, fusarium silvicola</i>                                                 | Nectriaceae       | <i>Fusarium</i>       | <a href="#">NC_003885</a>                                                                                                                             | FUNGI   | Ascomycota    | Sordariomycetes | Hypocreales      |

|              |                 |                                                                            |                  |       |            |                                                                                                    |                    |                         |                                                       |       |            |                 |                          |
|--------------|-----------------|----------------------------------------------------------------------------|------------------|-------|------------|----------------------------------------------------------------------------------------------------|--------------------|-------------------------|-------------------------------------------------------|-------|------------|-----------------|--------------------------|
| Chyroviridae | Alphachyrovirus | <i>Virus de ARN de Gremmeniella abietina MSI</i>                           | 1782 nt          | dsRNA | 2005       | <i>Gremmeniella abietina</i>                                                                       | Helotiaceae        | <i>Gremmeniella</i>     | <a href="#">NC_004018</a>                             | FUNGI | Ascomycota | Sordariomycetes | <i>Helotiales</i>        |
|              |                 | <i>Ophiostoma partitivirus 1</i>                                           | 1567 nt          | dsRNA | 2009       | <i>Ophiostoma</i> sp.                                                                              | Ophiostomataceae   | <i>Ophiostoma</i>       | <a href="#">NC_038917</a>                             | FUNGI | Ascomycota | Sordariomycetes | Ophiostomatales          |
|              |                 | <i>Penicillium stoloniferum virus F y Penicillium stoloniferum virus S</i> | 1677 nt, 1754 nt | dsRNA | 2009, 1979 | <i>Penicillium stoloniferum</i> , <i>penicillium brevicompectum</i> , <i>aspergillus ochraceus</i> | Trichocomaceae     | <i>Penicillium</i>      | <a href="#">NC_007221</a> , <a href="#">NC_005976</a> | FUNGI | Ascomycota | Eurotiomycetes  | <i>Eurotiales</i>        |
|              |                 | <i>Aspergillus fumigatus chrysovirus</i>                                   | 3006 nt          | dsRNA | 2012       | <i>Aspergillus fumigatus</i>                                                                       | Trichocomaceae     | <i>Aspergillus</i>      | <a href="#">NC_038871</a>                             | FUNGI | Ascomycota | Eurotiomycetes  | <i>Eurotiales</i>        |
|              |                 | <i>Colletotrichum gloeosporioides chrysovirus</i>                          | 3397 nt          | dsRNA | 2016       | <i>Colletotrichum gloeosporioides</i>                                                              | Glomerellaceae     | <i>Colletotrichum</i>   | <a href="#">NC_043666</a>                             | FUNGI | Ascomycota | Sordariomycetes | <i>Glomerellales</i>     |
|              |                 | <i>Chrysothrix chrysovirus 1</i>                                           | 3552 nt          | dsRNA | 2020       | <i>Penicillium citreosulfuratum</i>                                                                | Trichocomaceae     | <i>Penicillium</i>      | <a href="#">MN625832</a>                              | FUNGI | Ascomycota | Eurotiomycetes  | <i>Eurotiales</i>        |
|              |                 | <i>Cryphonectria nitschkei chrysovirus 1</i>                               | 2978 nt          | dsRNA | 2006       | <i>Cryphonectria nitschkei</i>                                                                     | Cryphonectriaceae  | <i>Cryphonectria</i>    | <a href="#">NC_038778</a>                             | FUNGI | Ascomycota | Sordariomycetes | <i>Diaporthales</i>      |
|              |                 | <i>Fusarium oxysporum chrysovirus 1</i>                                    | 2574 nt          | ssRNA | 2007       | <i>Fusarium oxysporum</i>                                                                          | Nectriaceae        | <i>Fusarium</i>         | <a href="#">NC_043218</a>                             | FUNGI | Ascomycota | Sordariomycetes | <i>Hypocreales</i>       |
|              |                 | <i>Virus Helminthosporium victoriae 145S</i>                               | 3612 nt          | RNA   | 2002       | <i>Helminthosporium victoriae</i>                                                                  | Pleosporaceae      | <i>Helminthosporium</i> | <a href="#">NC_005978</a>                             | FUNGI | Ascomycota | Dothideomycetes | <i>Pleosporales</i>      |
|              |                 | <i>Isaria Javanica Chrysovirus</i>                                         | 3593 nt          | dsRNA | 2017       | <i>Isaria Javanica</i> , <i>Cordyceps javanica</i>                                                 | Cordycipitaceae    | <i>Isaria</i>           | <a href="#">NC_033277</a>                             | FUNGI | Ascomycota | Sordariomycetes | <i>Hypocreales</i>       |
|              | Betachyrovirus  | <i>Macrophoma phaseolina chrysovirus</i>                                   | 3712 nt          | dsRNA | 2015       | <i>Macrophoma phaseolina</i>                                                                       | Botryosphaeriaceae | <i>Macrophoma</i>       | <a href="#">NC_043662</a>                             | FUNGI | Ascomycota | Dothideomycetes | <i>Botryosphaeriales</i> |
|              |                 | <i>Virus penicillium brevicompectum</i>                                    | 3149 nt          | ssRNA | 2002       | <i>Penicillium brevicompectum</i>                                                                  | Trichocomaceae     | <i>Penicillium</i>      | <a href="#">MG887748</a>                              | FUNGI | Ascomycota | Eurotiomycetes  | <i>Eurotiales</i>        |
|              |                 | <i>Virus penicillium chrysogenum</i>                                       | 3562 nt          | dsRNA | 1979       | <i>Penicillium chrysogenum</i>                                                                     | Trichocomaceae     | <i>Penicillium</i>      | <a href="#">NC_007539</a>                             | FUNGI | Ascomycota | Eurotiomycetes  | <i>Eurotiales</i>        |
|              |                 | <i>Penicillium cyaneofulvum virus</i>                                      |                  | dsRNA | 1979       | <i>Penicillium cyaneofulvum</i>                                                                    | Trichocomaceae     | <i>Penicillium</i>      | <a href="#">Sem entrada no Genbank</a>                | FUNGI | Ascomycota | Eurotiomycetes  | <i>Eurotiales</i>        |
|              |                 | <i>Verticillium dahliae chrysovirus 1</i>                                  | 3313 nt          | dsRNA | 2010       | <i>Verticillium dahliae</i>                                                                        | Incertae           | <i>Verticillium</i>     | <a href="#">NC_038782</a>                             | FUNGI | Ascomycota | Sordariomycetes | <i>Glomerellales</i>     |
|              |                 | <i>Alternaria alternata chrysovirus</i>                                    | 2785 nt          | dsRNA | 2018       | <i>alternaria alternata</i>                                                                        | Pleosporaceae      | <i>Alternaria</i>       | <a href="#">NC_040736</a>                             | FUNGI | Ascomycota | Dothideomycetes | <i>Pleosporales</i>      |
|              |                 | <i>Botryosphaeria dothidea chrysovirus</i>                                 | 2397 nt          | dsRNA | 2014       | <i>Botryosphaeria dothidea</i>                                                                     | Botryosphaeriaceae | <i>Botryosphaeria</i>   | <a href="#">NC_033476</a>                             | FUNGI | Ascomycota | Dothideomycetes | <i>Botryosphaeriales</i> |
|              |                 | <i>Aspergillus thermomutatus chrysovirus 1</i>                             | 3589 nt          | dsRNA | 2018       | <i>Aspergillus thermomutatus</i>                                                                   | Trichocomaceae     | <i>Aspergillus</i>      | <a href="#">MF045841</a>                              | FUNGI | Ascomycota | Eurotiomycetes  | <i>Eurotiales</i>        |
|              |                 | <i>Colletotrichum fructicola chrysovirus 1</i>                             | 3620 nt          | dsRNA | 2018       | <i>Colletotrichum fructicola</i>                                                                   | glomerellaceae     | <i>Colletotrichum</i>   | <a href="#">NC_040485</a>                             | FUNGI | Ascomycota | Sordariomycetes | <i>Glomerellales</i>     |

|                        |                          |                                                   |          |       |      |                                                          |                    |                          |                           |       |               |                 |                   |
|------------------------|--------------------------|---------------------------------------------------|----------|-------|------|----------------------------------------------------------|--------------------|--------------------------|---------------------------|-------|---------------|-----------------|-------------------|
|                        |                          | <i>Coniothyrium diplodiella chrysovirus 1</i>     | 3625 nt  | dsRNA | 2020 | <i>Coniella diplodiella</i>                              | Melanconidaceae    | <i>Coniella</i>          | <a href="#">MK584812</a>  | FUNGI | Ascomycota    | Sordariomycetes | Diaporthales      |
|                        |                          | <i>Fusarium graminearum chrysovirus</i>           | 3580 nt  | dsRNA | 2018 | <i>Fusarium graminearum</i>                              | Nectriaceae        | <i>Fusarium</i>          | <a href="#">HQ343295</a>  | FUNGI | Ascomycota    | Sordariomycetes | Hypocreales       |
|                        |                          | <i>Fusarium oxysporum chrysovirus 2</i>           | 3555 nt  | dsRNA | 2015 | <i>Fusarium oxysporum</i>                                | Nectriaceae        | <i>Fusarium</i>          | <a href="#">NC_027563</a> | FUNGI | Ascomycota    | Sordariomycetes | Hypocreales       |
|                        |                          | <i>Penicillium janczewskii chrysovirus 1</i>      | 3698 nt  | dsRNA | 2015 | <i>Penicillium janczewskii</i>                           | Trichocomaceae     | <i>Penicillium</i>       | <a href="#">NC_028495</a> | FUNGI | Ascomycota    | Eurotiomycetes  | Eurotiales        |
|                        |                          | <i>Penicillium janczewskii chrysovirus 2</i>      | 2699 nt  | ssRNA | 2015 | <i>Penicillium janczewskii</i>                           | Trichocomaceae     | <i>Penicillium</i>       | <a href="#">NC_043669</a> | FUNGI | Ascomycota    | Eurotiomycetes  | Eurotiales        |
|                        |                          | <i>Magnaporthe oryzae chrysovirus</i>             | 2879 nt  | dsRNA | 2010 | <i>Magnaporthe oryzae</i> ,<br><i>Pyricularia oryzae</i> | Magnaportheaceae   | <i>Magnaporthe</i>       | <a href="#">NC_038011</a> | FUNGI | Ascomycota    | Sordariomycetes | Magnaporthales    |
|                        |                          | <i>Neofusicoccum parvum chrysovirus 1</i>         | 3698 nt  | dsRNA | 2020 | <i>Neofusicoccum parvum</i>                              | Botryosphaeriaceae | <i>Neodusicoccum</i>     | <a href="#">NC_028495</a> | FUNGI | Ascomycota    | Saccharomycetes | Botryosphaeriales |
| <b>Amalgamiviridae</b> | Zybayvirus               | <i>Zygosaccharomyces bailii virus Z</i>           | 3157 nt  | dsRNA | 2018 | <i>Zygosaccharomyces bailii</i>                          | Saccharomycetaceae | <i>Zygosaccharomyces</i> | <a href="#">NC_003874</a> | FUNGI | Ascomycota    | Saccharomycetes | Saccharomycetales |
| <b>Curvulaviridae</b>  | <i>Orthocurvulavirus</i> | <i>Curvularia orthocurvulavirus 1</i>             |          | dsRNA | 2020 | <i>Curvularia</i> sp.                                    | Pleosporaceae      | <i>Curvularia</i>        | **                        | FUNGI | Ascomycota    | Saccharomycetes | Pleosporales      |
|                        |                          | <i>Fusarium graminearum orthocurvulavirus</i>     |          | dsRNA | 2020 | <i>Fusarium graminearum</i>                              | Nectriaceae        | <i>Fusarium</i>          | **                        | FUNGI | Ascomycota    | Saccharomycetes | Hypocreales       |
|                        |                          | <i>Heterobasidion orthocurvulavirus</i>           |          | dsRNA | 2020 | <i>Heterobasidion</i> sp.                                | Bondarzewiaceae    | <i>Heterobasidion</i>    | **                        | FUNGI | Basidiomycota | Agaricomycetes  | Russulales        |
|                        |                          | <i>Lactarius rufus orthocurvulavirus 1</i>        |          | dsRNA | 2020 | <i>Lactarius rufus</i>                                   | Russulaceae        | <i>Lactarius</i>         | **                        | FUNGI | Basidiomycota | Agaricomycetes  | Russulales        |
|                        |                          | <i>Rhizoctonia solani orthocurvulavirus 1</i>     |          | dsRNA | 2020 | <i>Rhizoctonia solani</i>                                | Ceratobasidiaceae  | <i>Rhizoctonia</i>       | **                        | FUNGI | Basidiomycota | Agaricomycetes  | Cantharellales    |
|                        |                          | <i>Lactarius tabidus orthocurvulavirus 1</i>      |          | dsRNA | 2020 | <i>Lactarius tabidus</i>                                 | Russulaceae        | <i>Lactarius</i>         | **                        | FUNGI | Basidiomycota | Agaricomycetes  | Russulales        |
|                        |                          | <i>Sclerotium hydrophilum orthocurvulavirus 1</i> |          | dsRNA | 2020 | <i>Sclerotium hydrophilum</i>                            | Typhulaceae        | <i>Sclerotium</i>        | **                        | FUNGI | Basidiomycota | Agaricomycetes  | Thelephorales     |
|                        |                          | <i>Trichoderma harzianum orthocurvulavirus 1</i>  |          | dsRNA | 2020 | <i>Trichoderma harzianum</i>                             | Hypocreaceae       | <i>Trichoderma</i>       | **                        | FUNGI | Ascomycota    | Sordariomycetes | Hypocreales       |
| <b>Hypoviridae</b>     | Not assigned             | <i>Sclerotinia sclerotiorum hypovirus 7</i>       | 10208 nt | ssRNA | 2021 | <i>Sclerotinia sclerotiorum</i>                          | Sclerotiniaceae    | <i>Sclerotinia</i>       | <a href="#">MT646394</a>  | FUNGI | Ascomycota    | Leotiomycetes   | Helotiales        |



|               |                   |                                                                                 |                  |       |            |                                                              |                                 |                       |                                                          |       |                      |                        |                          |
|---------------|-------------------|---------------------------------------------------------------------------------|------------------|-------|------------|--------------------------------------------------------------|---------------------------------|-----------------------|----------------------------------------------------------|-------|----------------------|------------------------|--------------------------|
| Endomaviridae | Alphaendornavirus | <i>Coniothyrium minitans</i><br>RNA virus                                       | 4975 nt          | dsRNA | 2003       | <i>Coniothyrium minitans</i>                                 | Phaeosphaeriaceae               | <i>Coniothyrium</i>   | <a href="#">NC_007523</a>                                | FUNGI | <i>Ascomycota</i>    | <i>Dothideomycetes</i> | <i>Pleosporales</i>      |
|               |                   | <i>Epichloe festucae</i> virus 1                                                | 5109 nt          | dsRNA | 2006       | <i>Epichloe festucae</i>                                     | Clavicipitaceae                 | <i>Epichloe</i>       | <a href="#">NC_038930</a>                                | FUNGI | <i>Ascomycota</i>    | <i>Sordariomycetes</i> | <i>Hypocreales</i>       |
|               |                   | <i>Gremmeniella abietina</i><br>RNA virus LI                                    | 5133 nt          | dsRNA | 2001       | <i>Gremmeniella abietina</i>                                 | Helotiaceae                     | <i>Gremmeniella</i>   | <a href="#">NC_003876</a>                                | FUNGI | <i>Ascomycota</i>    | <i>Leotiomycetes</i>   | <i>Helotiales</i>        |
|               |                   | <i>Helminthosporium victoriae</i> virus 190S                                    | 5179 nt          | dsRNA | 1990       | <i>Bipolaris victoriae</i>                                   | Pleosporaceae                   | <i>Bipolaris</i>      | <a href="#">NC_003607</a>                                | FUNGI | <i>Ascomycota</i>    | <i>Dothideomycetes</i> | <i>Pleosporales</i>      |
|               |                   | <i>Helicobasidium mompa</i> totivirus 1-17                                      | 5207 nt          | dsRNA | 2003       | <i>Helicobasidium mompa</i>                                  | Platyglaceae                    | <i>Helicobasidium</i> | <a href="#">NC_005074</a>                                | FUNGI | <i>Basidiomycota</i> | <i>Pucciniomycetes</i> | <i>Helicobasidiales</i>  |
|               |                   | <i>Magnaporthe oryzae</i> virus 1 y <i>Magnaporthe oryzae</i> virus 2           | 5350 nt          | dsRNA | 2008, 2013 | <i>Magnaporthe oryzae</i>                                    | Magnaportheaceae                | <i>Magnaporthe</i>    | <a href="#">NC_006367</a>                                | FUNGI | <i>Ascomycota</i>    | <i>Sordariomycetes</i> | <i>Magnaportheales</i>   |
|               |                   | <i>Rosellinia necatrix</i> victorivirus 1                                       | 5329 nt          | ssRNA | 2012       | <i>Rosellinia necatrix</i> y <i>Cryphonectria parasitica</i> | Xylariaceae y Cryphonectriaceae | <i>Rosellinia</i>     | <a href="#">NC_021565</a>                                | FUNGI | <i>Ascomycota</i>    | <i>Sordariomycetes</i> | <i>Xylariales</i>        |
|               |                   | <i>Sphaeropsis sapinea</i> RNA virus 1 y <i>Sphaeropsis sapinea</i> RNA virus 2 | 5163 nt, 5202 nt | dsRNA | 1998, 1998 | <i>Diplodia sapinea</i>                                      | Botryosphaeriaceae              | <i>Sphaeropsis</i>    | <a href="#">NC_001963</a> ,<br><a href="#">NC_001964</a> | FUNGI | <i>Ascomycota</i>    | <i>Dothideomycetes</i> | <i>Botryosphaeriales</i> |
|               |                   | <i>Tolypocladium cylindrosporum</i> virus 1                                     | 5196 nt          | dsRNA | 2010       | <i>Tolypocladium cylindrosporum</i>                          | Ophiocordycipitaceae            | <i>Tolypocladium</i>  | <a href="#">NC_014823</a>                                | FUNGI | <i>Ascomycota</i>    | <i>Sordariomycetes</i> | <i>Hypocreales</i>       |
|               |                   | <i>Agaricus bisporus</i> alphaendornavirus 1                                    | 12730 nt         | dsRNA | 2017       | <i>Agaricus bisporus</i>                                     | Agaricaceae                     | <i>Agaricus</i>       | <a href="#">KY357509</a>                                 | FUNGI | <i>Basidiomycota</i> | <i>Agaricomycetes</i>  | <i>Agaricales</i>        |
| Endomaviridae | Alphaendornavirus | <i>Erysiphe cichoracearum</i> alphaendornavirus                                 | 11907 nt         | dsRNA | 2016       | <i>Golovino myces cichoracearum</i>                          | Erysiphaceae                    | <i>Erysiphe</i>       | <a href="#">NC_029095</a>                                | FUNGI | <i>Ascomycota</i>    | <i>Leotiomycetes</i>   | <i>Erysiphales</i>       |
|               |                   | <i>Helicobasidium mompa</i> alphaendornavirus 1                                 | 16614 nt         | dsRNA | 2006       | <i>Helicobasidium mompa</i>                                  | Helicobasidiaceae               | <i>Helicobasidium</i> | <a href="#">NC_013447</a>                                | FUNGI | <i>Ascomycota</i>    | <i>Dothideomycetes</i> | <i>Pleosporales</i>      |
|               |                   | <i>Rhizoctonia cerealis</i> alphaendornavirus 1                                 | 17486 nt         | dsRNA | 2016       | <i>Ceratobasidium cereale</i>                                | Ceratobasidiaceae               | <i>Ceratobasidium</i> | <a href="#">NC_022619</a>                                | FUNGI |                      | <i>Basidiomycota</i>   |                          |
|               |                   | <i>Rhizoctonia solani</i> alphaendornavirus 2                                   | 15850 nt         | dsRNA | 2016       | <i>Rhizoctonia solani</i>                                    | Ceratobasidiaceae               | <i>Rhizoctonia</i>    | <a href="#">KT823701</a>                                 | FUNGI | <i>Basidiomycota</i> | <i>Agaricomycetes</i>  | <i>Cantharellales</i>    |
|               |                   | <i>Alternaria brassicicola</i> betaendornavirus 1                               | 10290 nt         | RNA   | 2014       | <i>Alternaria brassicicola</i>                               | Pleosporaceae                   | <i>Alternaria</i>     | <a href="#">NC_026136</a>                                | FUNGI | <i>Ascomycota</i>    | <i>Dothideomycetes</i> | <i>Pleosporales</i>      |

|                   |                 |                                                                   |          |       |      |                                 |                 |                     |                           |       |            |                         |                    |
|-------------------|-----------------|-------------------------------------------------------------------|----------|-------|------|---------------------------------|-----------------|---------------------|---------------------------|-------|------------|-------------------------|--------------------|
|                   |                 | <i>Botrytis cinerea betaendornavirus 1</i>                        | 11557 nt | RNA   | 2016 | <i>Botrytis cinerea</i>         | Sclerotinicaeae | <i>Botrytis</i>     | <a href="#">NC_031752</a> | FUNGI | Ascomycota | <i>Leotiomyces</i>      | <i>Helotiales</i>  |
|                   |                 | <i>Rosellinia necratix betaendornavirus 1</i>                     | 9639 nt  | RNA   | 2015 | <i>Rosellinia necratix</i>      | Xylariaceae     | <i>Rosellinia</i>   | <a href="#">NC_030938</a> | FUNGI | Ascomycota | <i>Sordario micetos</i> | <i>Xylariales</i>  |
|                   |                 | <i>Gremmeniella abietina betaendornavirus 1</i>                   | 10375 nt | dsRNA | 2006 | <i>Gremmeniella abietina</i>    | Helotiaceae     | <i>Gremmeniella</i> | <a href="#">NC_007920</a> | FUNGI | Ascomycota | <i>Sordario micetos</i> | <i>Helotiales</i>  |
|                   |                 | <i>Sclerotinia minor betaendornavirus 1</i>                       | 12626 nt | RNA   | 2018 | <i>Sclerotinia minor</i>        | Sclerotiniaceae | <i>Sclerotinia</i>  | <a href="#">NC_040631</a> | FUNGI | Ascomycota | <i>Leotiomyces</i>      | <i>Helotiales</i>  |
|                   |                 | <i>Sclerotinia sclerotiorum betaendornavirus 1</i>                | 10513 nt | dsRNA | 2013 | <i>Sclerotinia sclerotiorum</i> | Sclerotiniaceae | <i>Sclerotinia</i>  | <a href="#">NC_023893</a> | FUNGI | Ascomycota | <i>Leotiomyces</i>      | <i>Helotiales</i>  |
|                   |                 | <i>Tuber aestivum betaendornavirus</i>                            | 9760 nt  | RNA   | 2011 | <i>Tuber aestivum</i>           | Tuberaceae      | <i>Tuber</i>        | <a href="#">NC_014904</a> | FUNGI | Ascomycota | <i>Pezizomyces</i>      | <i>Pezizales</i>   |
|                   | Not assigned    | <i>Sclerotinia sclerotiorum endornavirus 1-WX</i>                 | 10596 nt | ssRNA | 2021 | <i>Sclerotinia sclerotiorum</i> | Sclerotiniaceae | <i>Sclerotinia</i>  | <a href="#">MT646414</a>  | FUNGI | Ascomycota | <i>Leotiomyces</i>      | <i>Helotiales</i>  |
|                   |                 | <i>Sclerotinia sclerotiorum endornavirus 8</i>                    | 11543 nt | ssRNA | 2021 | <i>Sclerotinia sclerotiorum</i> | Sclerotiniaceae | <i>Sclerotinia</i>  | <a href="#">MT646356</a>  | FUNGI | Ascomycota | <i>Leotiomyces</i>      | <i>Helotiales</i>  |
|                   |                 | <i>Sclerotinia sclerotiorum endornavirus 9</i>                    | 13562 nt | ssRNA | 2021 | <i>Sclerotinia sclerotiorum</i> | Sclerotiniaceae | <i>Sclerotinia</i>  | <a href="#">MT646421</a>  | FUNGI | Ascomycota | <i>Leotiomyces</i>      | <i>Helotiales</i>  |
|                   |                 | <i>Sclerotinia sclerotiorum endornavirus 10</i>                   | 2504 nt  | ssRNA | 2021 | <i>Sclerotinia sclerotiorum</i> | Sclerotiniaceae | <i>Sclerotinia</i>  | <a href="#">MT646402</a>  | FUNGI | Ascomycota | <i>Leotiomyces</i>      | <i>Helotiales</i>  |
|                   |                 | <i>Sclerotinia sclerotiorum endornavirus 3</i>                    | 12631 nt | ssRNA | 2021 | <i>Sclerotinia sclerotiorum</i> | Sclerotiniaceae | <i>Sclerotinia</i>  | <a href="#">MT706020</a>  | FUNGI | Ascomycota | <i>Leotiomyces</i>      | <i>Helotiales</i>  |
|                   |                 |                                                                   |          |       |      |                                 |                 |                     |                           |       |            |                         |                    |
| Alphaflexiviridae | Botrexvirus     | <i>Botrytis virus X</i>                                           | 6966 nt  | ssRNA | 2003 | <i>Botrytis cinerea</i>         | Sclerotinicaeae | <i>Botrytis</i>     | <a href="#">NC_005132</a> | FUNGI | Ascomycota | <i>Leotiomyces</i>      | <i>Helotiales</i>  |
|                   | Sclerodamavirus | <i>Sclerotinia sclerotiorum debilitation-associated RNA virus</i> | 5470 nt  | dsRNA | 2003 | <i>Sclerotinia sclerotiorum</i> | Sclerotinicaeae | <i>Sclerotinia</i>  | <a href="#">NC_007415</a> | FUNGI | Ascomycota | <i>Leotiomyces</i>      | <i>Helotiales</i>  |
|                   |                 |                                                                   |          |       |      |                                 |                 |                     |                           |       |            |                         |                    |
|                   |                 |                                                                   |          |       |      |                                 |                 |                     |                           |       |            |                         |                    |
| Deltaflexiviridae | Deltaflexivirus | <i>Fusarium deltaflexivirus 1</i>                                 | 8246 nt  | ssRNA | 2016 | <i>Fusarium sp.</i>             | Nectriaceae     | <i>Fusarium</i>     | <a href="#">NC_030654</a> | FUNGI | Ascomycota | <i>Sordario micetos</i> | <i>Hypocreales</i> |
|                   |                 | <i>Sclerotinia deltaflexivirus 1</i>                              | 8178 nt  | ssRNA | 2016 | <i>Sclerotinia sp.</i>          | Sclerotinicaeae | <i>Sclerotinia</i>  | <a href="#">NC_038977</a> | FUNGI | Ascomycota | <i>Leotiomyces</i>      | <i>Helotiales</i>  |

|              |              |                                                                                  |                  |       |            |                                 |                    |                          |                                                       |       |               |                        |                          |
|--------------|--------------|----------------------------------------------------------------------------------|------------------|-------|------------|---------------------------------|--------------------|--------------------------|-------------------------------------------------------|-------|---------------|------------------------|--------------------------|
| Not assigned |              | <i>Sclerotinia sclerotiorum deltaflexivirus 3 S1</i>                             | 7403 nt          | ssRNA | 2021       | <i>Sclerotinia sclerotiorum</i> | Sclerotiniaceae    | <i>Sclerotinia</i>       | <a href="#">MT706024</a>                              | FUNGI | Ascomycota    | <i>Leotiomicetos</i>   | <i>Helotiales</i>        |
|              |              | <i>Sclerotinia sclerotiorum deltaflexivirus 3 S2</i>                             | 2560 nt          | ssRNA | 2021       | <i>Sclerotinia sclerotiorum</i> | Sclerotiniaceae    | <i>Sclerotinia</i>       | <a href="#">MW452524</a>                              | FUNGI | Ascomycota    | <i>Leotiomicetos</i>   | <i>Helotiales</i>        |
|              |              | <i>Sclerotinia sclerotiorum deltaflexivirus 2-WX</i>                             | 6651 nt          | ssRNA | 2021       | <i>Sclerotinia sclerotiorum</i> | Sclerotiniaceae    | <i>Sclerotinia</i>       | <a href="#">MT646426</a>                              | FUNGI | Ascomycota    | <i>Leotiomicetos</i>   | <i>Helotiales</i>        |
|              |              | <i>Sclerotinia sclerotiorum deltaflexivirus 3</i>                                | 7375 nt          | ssRNA | 2021       | <i>Sclerotinia sclerotiorum</i> | Sclerotiniaceae    | <i>Sclerotinia</i>       | <a href="#">MT646428</a>                              | FUNGI | Ascomycota    | <i>Leotiomicetos</i>   | <i>Helotiales</i>        |
|              |              | <i>Sclerotinia sclerotiorum deltaflexivirus 1-WX</i>                             | 8124 nt          | ssRNA | 2021       | <i>Sclerotinia sclerotiorum</i> | Sclerotiniaceae    | <i>Sclerotinia</i>       | <a href="#">MT646429</a>                              | FUNGI | Ascomycota    | <i>Leotiomicetos</i>   | <i>Helotiales</i>        |
|              |              | <i>Sclerotinia sclerotiorum deltaflexivirus 3 S3</i>                             | 1827 nt          | ssRNA | 2021       | <i>Sclerotinia sclerotiorum</i> | Sclerotiniaceae    | <i>Sclerotinia</i>       | <a href="#">MW452525</a>                              | FUNGI | Ascomycota    | <i>Leotiomicetos</i>   | <i>Helotiales</i>        |
| Narnaviridae | Barnaviridae | Mushroom bacilliform virus                                                       | 4009 nt          | ssRNA | 1993       | <i>Agaricus bisporus</i>        | Agaricaceae        | <i>Agaricus</i>          | <a href="#">NC_001633</a>                             | FUNGI | Basidiomycota | <i>Agaricomycetos</i>  | <i>Agaricales</i>        |
|              | Not assigned | Contig2_gc1_gc4_2hits                                                            |                  |       |            | <i>Moniliophthora roreri</i>    | Marasmiaceae       | <i>Moniliophthora sp</i> | **                                                    | FUNGI | Basidiomycota | <i>Agaricomycetos</i>  | <i>Agaricales</i>        |
|              |              | Contig1_gc1_gc4_manhits                                                          |                  |       |            | <i>Moniliophthora roreri</i>    | Marasmiaceae       | <i>Moniliophthora sp</i> | **                                                    | FUNGI | Basidiomycota | <i>Agaricomycetos</i>  | <i>Agaricales</i>        |
|              |              | Contig3_gc4_gc1_orf menor_8hits                                                  |                  |       |            | <i>Moniliophthora roreri</i>    | Marasmiaceae       | <i>Moniliophthora sp</i> | **                                                    | FUNGI | Basidiomycota | <i>Agaricomycetos</i>  | <i>Agaricales</i>        |
|              |              | <i>Sclerotinia sclerotiorum narnavirus 1</i>                                     | 2562 nt          | ssRNA | 2021       | <i>Sclerotinia sclerotiorum</i> | Sclerotiniaceae    | <i>Sclerotinia</i>       | <a href="#">MT646401</a>                              | FUNGI | Basidiomycota | <i>Agaricomycetos</i>  | <i>Agaricales</i>        |
|              |              | <i>Sclerotinia sclerotiorum narnavirus 2</i>                                     | 2382 nt          | ssRNA | 2021       | <i>Sclerotinia sclerotiorum</i> | Sclerotiniaceae    | <i>Sclerotinia</i>       | <a href="#">MT646403</a>                              | FUNGI | Basidiomycota | <i>Agaricomycetos</i>  | <i>Agaricales</i>        |
|              |              | <i>Sclerotinia sclerotiorum narnavirus 3</i>                                     |                  | ssRNA | 2021       | <i>Sclerotinia sclerotiorum</i> | Sclerotiniaceae    | <i>Sclerotinia</i>       | **                                                    | FUNGI | Basidiomycota | <i>Agaricomycetos</i>  | <i>Agaricales</i>        |
|              |              | <i>Sclerotinia sclerotiorum narnavirus 4</i>                                     |                  | ssRNA | 2021       | <i>Sclerotinia sclerotiorum</i> | Sclerotiniaceae    | <i>Sclerotinia</i>       | **                                                    | FUNGI | Basidiomycota | <i>Agaricomycetos</i>  | <i>Agaricales</i>        |
|              | Narnavirus   | <i>Narnavirus de ARN Saccharomyces 20S y Narnavirus de ARN Saccharomyces 23S</i> | 2514 nt, 2891 nt | dsRNA | 1998, 1998 | <i>Saccharomyces</i>            | Saccharomycetaceae | <i>Saccharomyces</i>     | <a href="#">NC_004051</a> , <a href="#">NC_004050</a> | FUNGI | Ascomycota    | <i>Sordariomicetos</i> | <i>Saccharomycetales</i> |

|                   |                            |                                                                                                                       |                  |        |                  |                                  |                          |                            |                                                     |       |                        |                               |                                |
|-------------------|----------------------------|-----------------------------------------------------------------------------------------------------------------------|------------------|--------|------------------|----------------------------------|--------------------------|----------------------------|-----------------------------------------------------|-------|------------------------|-------------------------------|--------------------------------|
| Pseudoviridae     | Hemivirus                  | <i>Virus Candida albicans Tca2 y Virus Candida albicans Tca5</i>                                                      | 6980 nt, 5911 nt | ssRNA  | 2004, 2004       | <i>Candida albicans</i>          | Saccharomycetaceae       | <i>Candida</i>             | <a href="#">AF050215</a> , <a href="#">AF065434</a> | FUNGI | <i>Ascomycota</i>      | <i>Sordariomycetes</i>        | <i>Saccharomycetales</i>       |
|                   |                            | <i>Virus de Saccharomyces cerevisiae Ty5</i>                                                                          |                  | ssRNA  | 1999             | <i>Saccharomyces cerevisiae</i>  | Saccharomycetaceae       | <i>Candida</i>             | **                                                  | FUNGI | <i>Ascomycota</i>      | <i>Sordariomycetes</i>        | <i>Saccharomycetales</i>       |
|                   | Pseudovirus                | <i>Virus Saccharomyces cerevisiae Ty1, Virus de Saccharomyces cerevisiae Ty2 y Virus Saccharomyces cerevisiae Ty4</i> | 5918 bp, 6727 bp | ssRNA  | 1998, 1999, 1999 | <i>Saccharomyces cerevisiae</i>  | Saccharomycetaceae       | <i>Saccharomyces</i>       | <a href="#">M18706</a> , <a href="#">M94164</a>     | FUNGI | <i>Ascomycota</i>      | <i>Sordariomycetes</i>        | <i>Saccharomycetales</i>       |
| Metaviridae       | Metavirus                  | <i>Virus Cladosporium fulvum T-1</i>                                                                                  | 7396 nt          | ssADN  | 1992             | <i>Cladosporium fulvum</i>       | Davidiellaceae           | <i>Cladosporium</i>        | <a href="#">NC_043491</a>                           | FUNGI | <i>Ascomycota</i>      | <i>Dothideomycetes</i>        | <i>Mycosphaerellales</i>       |
|                   |                            | <i>Fusarium oxysporum Skippy virus</i>                                                                                | 8457 nt          | ssADN  | 2005             | <i>Fusarium oxysporum</i>        | Nectriaceae              | <i>Fusarium</i>            | <a href="#">L34658</a>                              | FUNGI | <i>Ascomycota</i>      | <i>Sordariomycetes</i>        | <i>Hypocreales</i>             |
|                   |                            | <i>Saccharomyces cerevisiae Ty3 virus</i>                                                                             | 5473 nt          | ssADN  | 1998             | <i>Saccharomyces cerevisiae</i>  | Saccharomycetaceae       | <i>Saccharomyces</i>       | <a href="#">M34549</a>                              | FUNGI | <i>Ascomycota</i>      | <i>Sordariomycetes</i>        | <i>Saccharomycetales</i>       |
|                   |                            | <i>Virus Schizosaccharomyces pombe Tj1 y Virus Schizosaccharomyces pombe Tj2</i>                                      | 4533 nt, 4916 nt | ssRNA  | 1999, 1999       | <i>Schizosaccharomyces pombe</i> | Schizosaccharomycetaceae | <i>Schizosaccharomyces</i> | <a href="#">M38526</a> , <a href="#">L10324</a>     | FUNGI | <i>Ascomycota</i>      | <i>Esquizosaccharomycetes</i> | <i>Schizosaccharomycetales</i> |
| Genomoviridae     | Genomovirus                | <i>Sclerotinia sclerotiorum hypovirulence associated DNA virus 1</i>                                                  | 2166nt           | ssDNA  |                  | <i>Sclerotinia sclerotiorum</i>  | Sclerotiniaceae          | <i>Sclerotinia</i>         | NC_013116.1                                         | FUNGI | <i>Ascomycota</i>      | <i>Leotiomycetes</i>          | <i>Helotiales</i>              |
| Gammaflexiviridae | mycoviruses                | <i>Sclerotinia sclerotiorum gammaflexivirus 1</i>                                                                     | 6818 nt          | ssRNA  | 2021             | <i>Sclerotinia sclerotiorum</i>  | Sclerotiniaceae          | <i>Sclerotinia</i>         | <a href="#">MT646392</a>                            | FUNGI | <i>Ascomycota</i>      | <i>Leotiomycetes</i>          | <i>Helotiales</i>              |
|                   |                            | <i>Botrytis virus F</i>                                                                                               | 6827 nt          | ssRNA  | 2000             | <i>Botrytis</i>                  | Sclerotiniaceae          | <i>Botrytis</i>            | <a href="#">NC_002604</a>                           | FUNGI | <i>Ascomycota</i>      | <i>Leotiomycetes</i>          | <i>Helotiales</i>              |
| Mymonaviridae     | <i>Auricularimonavirus</i> | <i>Auricularimonavirus auriculariae</i>                                                                               |                  | ssRNA- | 2020             | <i>Auricularia</i> sp.           | Auriculaceae             | <i>Auricularia</i>         | **                                                  | FUNGI | <i>Bacillariophyta</i> | <i>Bacillariophyceae</i>      | <i>Surirellales</i>            |

|                           |                                                            |          |        |      |                                                                        |                 |                        |                           |       |               |                       |                   |
|---------------------------|------------------------------------------------------------|----------|--------|------|------------------------------------------------------------------------|-----------------|------------------------|---------------------------|-------|---------------|-----------------------|-------------------|
| <i>Botryimonavirus</i>    | <i>Botrytimonavirus glicinis</i> (Dadou sclerotimonavirus) | 6218 nt  | ssRNA- | 2015 | Patogenos de raiz en cultivos de soja, <i>Sclerotinia sclerotiorum</i> | Sclerotinicaeae | <i>Sclerotinia</i> sp. | <a href="#">KT598228</a>  | FUNGI | Ascomycota    | <i>Leotiomicetos</i>  | <i>Helotiales</i> |
|                           | <i>Botrytimonavirus sclerotinae</i>                        |          | ssRNA- | 2018 | <i>Botrytis</i> sp                                                     | Sclerotiniaceae | <i>Botrytis</i>        | **                        | FUNGI | Ascomycota    | <i>Leotiomicetos</i>  | <i>Helotiales</i> |
|                           | <i>Botrytidis botrytimonavirus</i>                         |          | ssRNA- | 2020 | <i>Botrytis</i> sp                                                     | Sclerotiniaceae | <i>Botrytis</i>        | **                        | FUNGI | Ascomycota    | <i>Leotiomicetos</i>  | <i>Helotiales</i> |
| <i>Penicillimonavirus</i> | <i>Penicillimonavirus alphapenicillii</i>                  |          | ssRNA- | 2020 | Penicillium sp.                                                        | Trichocomaceae  | penicillium            | **                        | FUNGI | Ascomycota    | <i>Eurotiomicetes</i> | <i>Eurotiales</i> |
|                           | <i>Penicillimonavirus alphaplasmoparae</i>                 |          | ssRNA- | 2020 | Penicillium sp.                                                        | Trichocomaceae  | penicillium            | **                        | FUNGI | Ascomycota    | <i>Eurotiomicetes</i> | <i>Eurotiales</i> |
|                           | <i>Penicillimonavirus betapenicillii</i>                   |          | ssRNA- | 2020 | Penicillium sp.                                                        | Trichocomaceae  | penicillium            | **                        | FUNGI | Ascomycota    | <i>Eurotiomicetes</i> | <i>Eurotiales</i> |
|                           | <i>Penicillimonavirus deltaplasmoparae</i>                 |          | ssRNA- | 2020 | Penicillium sp.                                                        | Trichocomaceae  | penicillium            | **                        | FUNGI | Ascomycota    | <i>Eurotiomicetes</i> | <i>Eurotiales</i> |
|                           | <i>Penicillimonavirus épsilonplasmoparae</i>               |          | ssRNA- | 2020 | Penicillium sp.                                                        | Trichocomaceae  | penicillium            | **                        | FUNGI | Ascomycota    | <i>Eurotiomicetes</i> | <i>Eurotiales</i> |
|                           | <i>Penicillimonavirus etaplasmoparae</i>                   |          | ssRNA- | 2020 | Penicillium sp.                                                        | Trichocomaceae  | penicillium            | **                        | FUNGI | Ascomycota    | <i>Eurotiomicetes</i> | <i>Eurotiales</i> |
|                           | <i>Penicillimonavirus gammaplasmopara</i>                  |          | ssRNA- | 2020 | Penicillium sp.                                                        | Trichocomaceae  | penicillium            | **                        | FUNGI | Ascomycota    | <i>Eurotiomicetes</i> | <i>Eurotiales</i> |
|                           | <i>Penicillimonavirus kilnbarnense</i>                     |          | ssRNA- | 2020 | Penicillium sp.                                                        | Trichocomaceae  | penicillium            | **                        | FUNGI | Ascomycota    | <i>Eurotiomicetes</i> | <i>Eurotiales</i> |
|                           | <i>Penicillimonavirus zetaplasmoparae</i>                  |          | ssRNA- | 2020 | Penicillium sp.                                                        | Trichocomaceae  | penicillium            | **                        | FUNGI | Ascomycota    | <i>Eurotiomicetes</i> | <i>Eurotiales</i> |
|                           |                                                            |          |        |      |                                                                        |                 |                        |                           |       |               |                       |                   |
| <i>Lentimonavirus</i>     | <i>Lentimonavirus lentinulae</i>                           | 11563 nt | ssRNA- | 2019 | <i>Lentinula</i> sp.                                                   | Marasmiaceae    | <i>Lentinula</i> sp    | <a href="#">LC466007</a>  | FUNGI | Basidiomycota | <i>Agaricomycetos</i> | <i>Agaricales</i> |
| <i>Sclerotimonavirus</i>  | <i>Drop sclerotimonavirus</i>                              | 9707 nt  | ssRNA- | 2015 | Sclerotinia sclerotiorum                                               | Sclerotinicaeae | <i>Sclerotinia</i> sp. | <a href="#">NC_043483</a> | FUNGI | Ascomycota    | <i>Leotiomicetos</i>  | <i>Helotiales</i> |

|              |                                                                                                           |          |        |      |                                                                        |                 |                        |                           |       |            |               |            |
|--------------|-----------------------------------------------------------------------------------------------------------|----------|--------|------|------------------------------------------------------------------------|-----------------|------------------------|---------------------------|-------|------------|---------------|------------|
|              | <i>Glycine sclerotimonavirus (Sclerotimonavirus fusarii)</i>                                              | 9041 nt  | ssRNA- | 2015 | Patógenos de raíz en cultivos de soja, <i>Sclerotinia sclerotiorum</i> | Sclerotinicaeae | <i>Sclerotinia</i> sp. | <a href="#">KT598225</a>  | FUNGI | Ascomycota | Leotiomycetes | Helotiales |
|              | <i>Illinois sclerotimonavirus (Sclerotimonavirus illinoisense)</i>                                        | 7321 nt  | ssRNA- | 2015 | <i>Sclerotinia sclerotiorum</i>                                        | Sclerotinicaeae | <i>Sclerotinia</i> sp. | <a href="#">KT598227</a>  | FUNGI | Ascomycota | Leotiomycetes | Helotiales |
|              | <i>Sclerotinia sclerotimonavirus (Sclerotimonavirus sclerotinae)</i>                                      | 10002 nt | ssRNA- | 2015 | <i>Sclerotinia sclerotiorum</i>                                        | Sclerotinicaeae | <i>Sclerotinia</i> sp. | <a href="#">NC_025383</a> | FUNGI | Ascomycota | Leotiomycetes | Helotiales |
|              | <i>Sclerotinia homoeocarpa</i> TSA contig 1                                                               |          | ssRNA- | 2020 | <i>Sclerotinia sclerotiorum</i>                                        | Sclerotinicaeae | <i>Sclerotinia</i> sp. | <a href="#">JW826636</a>  | FUNGI | Ascomycota | Leotiomycetes | Helotiales |
|              | <i>Sclerotimonavirus alphaplasmoparae</i> (Myonavirus asociado a lesión de Plasmopara viticola 1-PvaMV-1) |          | ssRNA- | 2020 | <i>Sclerotinia sclerotiorum</i>                                        | Sclerotinicaeae | <i>Sclerotinia</i> sp. | **                        | FUNGI | Ascomycota | Leotiomycetes | Helotiales |
|              | <i>Esclerotimonavirus alternariae</i>                                                                     |          | ssRNA- | 2020 | <i>Sclerotinia sclerotiorum</i>                                        | Sclerotinicaeae | <i>Sclerotinia</i> sp. | **                        | FUNGI | Ascomycota | Leotiomycetes | Helotiales |
|              | <i>Sclerotimonavirus betaclarireediae</i>                                                                 |          | ssRNA- | 2020 | <i>Sclerotinia sclerotiorum</i>                                        | Sclerotinicaeae | <i>Sclerotinia</i> sp. | **                        | FUNGI | Ascomycota | Leotiomycetes | Helotiales |
|              | <i>Sclerotimonavirus betaplasmoparae</i>                                                                  |          | ssRNA- | 2020 | <i>Sclerotinia sclerotiorum</i>                                        | Sclerotinicaeae | <i>Sclerotinia</i> sp. | **                        | FUNGI | Ascomycota | Leotiomycetes | Helotiales |
|              | <i>Botrytis por esclerotimonavirus</i>                                                                    |          | ssRNA- | 2020 | <i>Sclerotinia sclerotiorum</i>                                        | Sclerotinicaeae | <i>Sclerotinia</i> sp. | **                        | FUNGI | Ascomycota | Leotiomycetes | Helotiales |
|              | <i>Esclerotimonavirus alphaclarireediae</i>                                                               |          | ssRNA- | 2020 | <i>Sclerotinia sclerotiorum</i>                                        | Sclerotinicaeae | <i>Sclerotinia</i> sp. | **                        | FUNGI | Ascomycota | Leotiomycetes | Helotiales |
|              | <i>Sclerotimonavirus terrae</i>                                                                           |          | ssRNA- | 2020 | <i>Sclerotinia sclerotiorum</i>                                        | Sclerotinicaeae | <i>Sclerotinia</i> sp. | **                        | FUNGI | Ascomycota | Leotiomycetes | Helotiales |
| Not assigned | <i>Sclerotinia sclerotiorum</i> negative-stranded RNA virus 10                                            | 9952 nt  | ssRNA- | 2021 | <i>Sclerotinia sclerotiorum</i>                                        | Sclerotiniaceae | <i>Sclerotinia</i>     | <a href="#">MT646378</a>  | FUNGI | Ascomycota | Leotiomycetes | Helotiales |

|                        |                      |                                                                                                                                                     |         |        |                        |                                 |                    |                       |                           |       |               |                 |                   |
|------------------------|----------------------|-----------------------------------------------------------------------------------------------------------------------------------------------------|---------|--------|------------------------|---------------------------------|--------------------|-----------------------|---------------------------|-------|---------------|-----------------|-------------------|
|                        |                      | <i>Sclerotinia sclerotiorum</i> negative-stranded RNA virus 9                                                                                       | 9624 nt | ssRNA- | 2021                   | <i>Sclerotinia sclerotiorum</i> | Sclerotiniaceae    | <i>Sclerotinia</i>    | <a href="#">MT646386</a>  | FUNGI | Ascomycota    | Leotiomycetes   | Helotiales        |
|                        |                      | <i>Sclerotinia sclerotiorum</i> negative-stranded RNA virus 1-WX                                                                                    | 9963 nt | ssRNA- | 2021                   | <i>Sclerotinia sclerotiorum</i> | Sclerotiniaceae    | <i>Sclerotinia</i>    | <a href="#">MT646384</a>  | FUNGI | Ascomycota    | Leotiomycetes   | Helotiales        |
|                        |                      | <i>Sclerotinia sclerotiorum</i> negative-stranded RNA virus 2-WX                                                                                    | 9623 nt | ssRNA- | 2021                   | <i>Sclerotinia sclerotiorum</i> | Sclerotiniaceae    | <i>Sclerotinia</i>    | <a href="#">MT646385</a>  | FUNGI | Ascomycota    | Leotiomycetes   | Helotiales        |
|                        |                      | <i>Sclerotinia sclerotiorum</i> negative-stranded RNA virus 11                                                                                      | 9982 nt | ssRNA- | 2021                   | <i>Sclerotinia sclerotiorum</i> | Sclerotiniaceae    | <i>Sclerotinia</i>    | <a href="#">MT646406</a>  | FUNGI | Ascomycota    | Leotiomycetes   | Helotiales        |
| <b>Phenuiviridae</b>   | <i>Lentivirus</i>    | <i>Lentivirus lentivirus</i>                                                                                                                        | 7082 nt | ssRNA- | 2019                   | <i>Lentivirus</i> sp.           | Marasmiaceae       | <i>Lentivirus</i> sp. | <a href="#">LC466008</a>  | FUNGI | Basidiomycota | Agaricomycetes  | Agaricales        |
| <b>Mitoviridae</b>     | <i>Mitovirus</i>     | <i>Cryphonectria mitovirus 1</i>                                                                                                                    | 2728 nt | dsRNA  | 1994                   | <i>Cryphonectria parasitica</i> | Cryphonectriaceae  | <i>Cryphonectria</i>  | <a href="#">NC_004046</a> | FUNGI | Ascomycota    | Sordariomycetes | Diaporthales      |
|                        |                      | <i>Mitovirus de Ophiostoma 4</i> ,<br><i>Mitovirus de Ophiostoma 5</i> ,<br><i>Mitovirus de Ophiostoma 6 e</i><br><i>Mitovirus de Ophiostoma 3a</i> |         | dsRNA  | 2002, 2002, 2002, 2002 | <i>Ophiostoma</i> sp.           | Ophiostomataceae   | <i>Ophiostoma</i>     | **                        | FUNGI | Ascomycota    | Sordariomycetes | Ophiostomatales   |
|                        |                      |                                                                                                                                                     |         |        |                        |                                 |                    |                       |                           |       |               |                 |                   |
| <b>Polymycoviridae</b> | <i>Polymycovirus</i> | <i>Aspergillus fumigatus</i> polymycovirus 1                                                                                                        | 1094 nt | dsRNA  | 2019                   | <i>Aspergillus fumigatus</i>    | Aspergillaceae     | <i>Aspergillus</i>    | <a href="#">NC_040418</a> | FUNGI | Ascomycota    | Eurotiomycetes  | Eurotiales        |
|                        |                      | <i>Aspergillus spelaus</i> polymycovirus 1                                                                                                          | 2384 nt | dsRNA  | 2019                   | <i>Aspergillus spelaus</i>      | Aspergillaceae     | <i>Aspergillus</i>    | <a href="#">MG887754</a>  | FUNGI | Ascomycota    | Eurotiomycetes  | Eurotiales        |
|                        |                      | <i>Beauveria bassiana</i> polymycovirus 1                                                                                                           | 2260 nt | dsRNA  | 2019                   | <i>Beauveria bassiana</i>       | Cordycipitaceae    | <i>Beauveria</i>      | <a href="#">NC_034257</a> | FUNGI | Ascomycota    | Sordariomycetes | Hypocreales       |
|                        |                      | <i>Botryosphaeria dothidea</i> virus 1                                                                                                              | 2397 nt | dsRNA  | 2019                   | <i>Botryosphaeria dothidea</i>  | Botryosphaeriaceae | <i>Botryosphaeria</i> | <a href="#">NC_033476</a> | FUNGI | Ascomycota    | Dothideomycetes | Botryosphaeriales |
|                        |                      | <i>Cladosporium cladosporioides</i> polymycovirus 1                                                                                                 |         | dsRNA  | 2019                   | <i>Cladosporium</i> sp.         | Cladosporiaceae    | <i>Cladosporium</i>   | **                        | FUNGI | Ascomycota    | Dothideomycetes | Cladosporiales    |

|                         |                       |                                                                  |         |       |            |                                                      |                 |                       |                           |       |               |                 |                |
|-------------------------|-----------------------|------------------------------------------------------------------|---------|-------|------------|------------------------------------------------------|-----------------|-----------------------|---------------------------|-------|---------------|-----------------|----------------|
|                         |                       | <i>Colletotrichum camelliae polymycovirus 1</i>                  |         | dsRNA | 2019       | <i>Colletotrichum camelliae</i>                      | Glomerellaceae  | <i>Colletotrichum</i> | **                        | FUNGI | Ascomycota    | Sordariomycetes | Glomerellales  |
|                         |                       | <i>Fusarium redolens polymycovirus 1</i>                         | 2470 nt | dsRNA | 2019       | <i>Fusarium redolens</i>                             | Nectriaceae     | <i>Fusarium</i>       | <a href="#">MK609920</a>  | FUNGI | Ascomycota    | Sordariomycetes | Hypocreales    |
|                         |                       | <i>Magnaporthe oryzae polymycovirus 1</i>                        | 2364 nt | dsRNA | 2019       | <i>Pyricularia oryzae</i>                            | Pyriculariaceae | <i>Pyricularia</i>    | <a href="#">MW752175</a>  | FUNGI | Ascomycota    | Sordariomycetes | Magnaporthales |
|                         |                       | <i>Penicillium digitatum polymycovirus 1</i>                     | 2382 nt | dsRNA | 2016       | <i>Penicillium digitatum</i>                         | Aspergillaceae  | <i>Penicillium</i>    | <a href="#">NC_040422</a> | FUNGI | Ascomycota    | Eurotiomycetes  | Eurotiales     |
|                         |                       | <i>Penicillium brevicompactum polymycovirus 1</i>                | 2400 nt | dsRNA | 2019       | <i>Penicillium brevicompactum</i>                    | Aspergillaceae  | <i>Penicillium</i>    | <a href="#">MG887750</a>  | FUNGI | Ascomycota    | Eurotiomycetes  | Eurotiales     |
| <b>Quadriviridae</b>    | <i>Quadrivir</i>      | <i>Rosellinia necatrix quadrivirus 1</i>                         | 4942 nt | dsRNA | 2012       | <i>Rosellinia necatrix</i>                           | Xylariaceae     | <i>Rosellinia</i>     | <a href="#">NC_016757</a> | FUNGI | Ascomycota    | Sordariomycetes | Xylariales     |
| <b>Megabirnaviridae</b> | <i>Megabirnavirus</i> | <i>Rosellinia necatrix megabirnavirus 1</i>                      | 7180 nt | dsRNA | 2009       | <i>Rosellinia necatrix</i>                           | Xylariaceae     | <i>Rosellinia</i>     | <a href="#">NC_013463</a> | FUNGI | Ascomycota    | Sordariomycetes | Xylariales     |
| <b>Botourmiaviridae</b> | <i>Botoulivirus</i>   | <i>Botrytis botoulivirus</i>                                     | 2903 nt | ssRNA | 2015       | <i>Botrytis</i> sp.,<br><i>Botrytis cinerea</i>      | Sclerotiniaceae | <i>Botrytis</i>       | <a href="#">NC_028476</a> | FUNGI | Ascomycota    | Leotiomyces     | Helotiales     |
|                         |                       | <i>Sclerotinia botoulivirus 2 y Sclerotinia botoulivirus 3</i>   | 2333 nt | ssRNA | 2015, 2020 | <i>Sclerotinia</i> sp.                               | Sclerotiniaceae | <i>Sclerotinia</i>    | <a href="#">KP900929</a>  | FUNGI | Ascomycota    | Leotiomyces     | Helotiales     |
|                         |                       | <i>Magnaporthe magoulivirus 1</i>                                | 2364 nt | ssRNA | 2016       | <i>Magnaporthe</i> sp.,<br><i>Pyricularia oryzae</i> | Magnaporthaceae | <i>Magnaporthe</i>    | <a href="#">NC_043683</a> | FUNGI | Ascomycota    | Sordariomycetes | Magnaporthales |
|                         | <i>Magoulivirus</i>   | <i>Cladosporium magoulivirus 1 y Cladosporium magoulivirus 2</i> |         | dsRNA | 2019       | <i>Cladosporium</i>                                  | Cladosporiaceae | <i>Cladosporium</i>   | **                        | FUNGI | Ascomycota    | Dothideomycetes | Cladosporiales |
|                         |                       | <i>Magnaporthe magoulivirus 1</i>                                | 2364 nt | ssRNA | 2018       | <i>Pyricularia oryzae</i>                            | Pyriculariaceae | <i>Pyricularia</i>    | <a href="#">NC_043683</a> | FUNGI | Ascomycota    | Sordariomycetes | Magnaporthales |
|                         |                       | <i>Penicillium magoulivirus</i>                                  |         | ssRNA | 2020       | <i>Penicillium</i>                                   | Aspergillaceae  | <i>Penicillium</i>    | **                        | FUNGI | Ascomycota    | Eurotiomycetes  | Eurotiales     |
|                         |                       | <i>Phaeoacremonium magoulivirus</i>                              |         | ssRNA | 2020       |                                                      |                 |                       | **                        | FUNGI |               |                 |                |
|                         |                       | <i>Rhizoctonia magoulivirus 1</i>                                | 2792 nt | ssRNA | 2015       | <i>Rhizoctonia solani</i>                            | Agonomycetaceae | <i>Rhizoctonia</i>    | <a href="#">KP900921</a>  | FUNGI | Basidiomycota | Agaricomycetes  | Cantharellales |

|                 |                                                                    |         |       |      |                                 |                    |                        |                          |       |               |                 |                   |
|-----------------|--------------------------------------------------------------------|---------|-------|------|---------------------------------|--------------------|------------------------|--------------------------|-------|---------------|-----------------|-------------------|
| Penoulivirus    | <i>Aspergillus penoulivirus</i>                                    |         | ssRNA | 2020 | <i>Aspergillus</i>              | Aspergillaceae     |                        | **                       | FUNGI |               |                 |                   |
|                 | <i>Cladosporium penoulivirus</i>                                   |         | dsRNA | 2020 | <i>Cladosporium</i>             | Cladosporiaceae    | <i>Cladosporium</i>    | **                       | FUNGI | Ascomycota    | Dothideomycetes | Cladosporiales    |
|                 | <i>Magnaporthe penoulivirus</i>                                    |         | ssRNA | 2020 | Pyricularia oryzae              | Pyriculariaceae    | <i>Pyricularia</i>     | **                       | FUNGI | Ascomycota    | Sordariomycetes | Magnaporthales    |
|                 | <i>Epicoccum penoulivirus</i>                                      |         | ssRNA | 2020 | <i>Epicoccum</i> sp.            | Didymellaceae      | <i>Epicoccum</i>       | **                       | FUNGI | Ascomycota    | Dothideomycetes | Pleosporales      |
|                 | <i>Neofusicoccum penoulivirus</i>                                  |         | ssRNA | 2020 | <i>Neofusicoccum</i> sp.        | Botryosphaeriaceae | <i>Neofusicoccum</i>   | **                       | FUNGI | Ascomycota    | Dothideomycetes | Botryosphaeriales |
|                 | <i>Phaeoacremonium penoulivirus</i>                                |         | ssRNA | 2020 | <i>Phaeoacremonium</i> sp.      | Valsaceae          | <i>Phaeoacremonium</i> | **                       | FUNGI | Ascomycota    | Sordariomycetes | Togniniales       |
|                 | <i>Phoma penoulivirus</i>                                          |         | ssRNA | 2020 | <i>Phoma</i> sp.                | Didymellaceae      | <i>Phoma</i>           | **                       | FUNGI | Ascomycota    | Dothideomycetes | Pleosporales      |
|                 | <i>Phomopsis penoulivirus</i>                                      |         | ssRNA | 2020 | <i>Phomopsis</i>                | Valsaceae          | <i>Phomopsis</i>       | **                       | FUNGI | Ascomycota    | Sordariomycetes | Diaporthales      |
|                 | <i>Pyricularia penoulivirus</i>                                    |         | ssRNA | 2020 | Pyricularia oryzae              | Pyriculariaceae    | <i>Pyricularia</i>     | **                       | FUNGI | Ascomycota    | Sordariomycetes | Magnaporthales    |
|                 | <i>Sclerotinia penoulivirus</i>                                    |         | ssRNA | 2020 | <i>Sclerotinia sclerotiorum</i> | Sclerotiniaceae    | <i>Sclerotinia</i>     | **                       | FUNGI | Ascomycota    | Leotiomycetes   | Helotiales        |
|                 | <i>Penicillium penoulivirus</i>                                    |         | ssRNA | 2020 | <i>Penicillium</i>              | Aspergillaceae     | <i>Penicillium</i>     | **                       | FUNGI | Ascomycota    | Eurotiomycetes  | Eurotiales        |
| Rhizoulivirus   | <i>Rhizoctonia rhizoulivirus</i>                                   |         | ssRNA | 2020 | <i>Rhizoctonia</i> sp.          | Ceratobasidiaceae  | <i>Rhizoctonia</i>     | **                       | FUNGI | Basidiomycota | Agaricomycetes  | Cantharellales    |
| Escleroulivirus | <i>Scleroulivirus de cladosporium</i>                              |         | ssRNA | 2020 | <i>Sclerotinia sclerotiorum</i> | Sclerotiniaceae    | <i>Sclerotinia</i>     | **                       | FUNGI | Ascomycota    | Leotiomycetes   | Helotiales        |
|                 | <i>Pyricularia scleroulivirus 2 e Pyricularia scleroulivirus 3</i> |         | ssRNA | 2020 | Pyricularia oryzae              | Pyriculariaceae    | <i>Pyricularia</i>     | **                       | FUNGI | Ascomycota    | Sordariomycetes | Magnaporthales    |
|                 | <i>Sclerotinia scleroulivirus 1</i>                                | 3180 nt | ssRNA | 2015 | <i>Sclerotinia sclerotiorum</i> | Sclerotiniaceae    | <i>Sclerotinia</i>     | <a href="#">KP900928</a> | FUNGI | Ascomycota    | Leotiomycetes   | Helotiales        |
| Not assigned    | <i>Sclerotinia sclerotiorum ourmia-like virus 5</i>                | 2910 nt | ssRNA | 2021 | <i>Sclerotinia sclerotiorum</i> | Sclerotiniaceae    | <i>Sclerotinia</i>     | <a href="#">MT646370</a> | FUNGI | Ascomycota    | Leotiomycetes   | Helotiales        |
|                 | <i>Sclerotinia sclerotiorum ourmia-like virus 6</i>                | 2602 nt | ssRNA | 2021 | <i>Sclerotinia sclerotiorum</i> | Sclerotiniaceae    | <i>Sclerotinia</i>     | <a href="#">MT646372</a> | FUNGI | Ascomycota    | Leotiomycetes   | Helotiales        |

|                         |              |                                                             |          |         |      |                                 |                 |                    |                           |       |            |               |            |
|-------------------------|--------------|-------------------------------------------------------------|----------|---------|------|---------------------------------|-----------------|--------------------|---------------------------|-------|------------|---------------|------------|
|                         |              | <i>Sclerotinia sclerotiorum ourmia-like virus 7</i>         | 3848 nt  | ssRNA   | 2021 | <i>Sclerotinia sclerotiorum</i> | Sclerotiniaceae | <i>Sclerotinia</i> | <a href="#">MT646365</a>  | FUNGI | Ascomycota | Leotiomicetes | Helotiales |
|                         |              | <i>Sclerotinia sclerotiorum ourmia-like virus 8</i>         | 2016 nt  | ssRNA   | 2021 | <i>Sclerotinia sclerotiorum</i> | Sclerotiniaceae | <i>Sclerotinia</i> | <a href="#">MT646373</a>  | FUNGI | Ascomycota | Leotiomicetes | Helotiales |
|                         |              | <i>Sclerotinia sclerotiorum ourmia-like virus 9</i>         | 1989 nt  | ssRNA   | 2021 | <i>Sclerotinia sclerotiorum</i> | Sclerotiniaceae | <i>Sclerotinia</i> | <a href="#">MT646374</a>  | FUNGI | Ascomycota | Leotiomicetes | Helotiales |
|                         |              | <i>Sclerotinia sclerotiorum ourmia-like virus 10</i>        | 2888 nt  | ssRNA   | 2021 | <i>Sclerotinia sclerotiorum</i> | Sclerotiniaceae | <i>Sclerotinia</i> | <a href="#">MT646379</a>  | FUNGI | Ascomycota | Leotiomicetes | Helotiales |
|                         |              | <i>Sclerotinia sclerotiorum ourmia-like virus 11</i>        | 2968 nt  | ssRNA   | 2021 | <i>Sclerotinia sclerotiorum</i> | Sclerotiniaceae | <i>Sclerotinia</i> | <a href="#">MT646400</a>  | FUNGI | Ascomycota | Leotiomicetes | Helotiales |
|                         |              | <i>Sclerotinia sclerotiorum ourmia-like virus 12</i>        | 2498 nt  | ssRNA   | 2021 | <i>Sclerotinia sclerotiorum</i> | Sclerotiniaceae | <i>Sclerotinia</i> | <a href="#">MT646377</a>  | FUNGI | Ascomycota | Leotiomicetes | Helotiales |
|                         |              | <i>Sclerotinia sclerotiorum ourmia-like virus 13</i>        | 2831 nt  | ssRNA   | 2021 | <i>Sclerotinia sclerotiorum</i> | Sclerotiniaceae | <i>Sclerotinia</i> | <a href="#">MT646375</a>  | FUNGI | Ascomycota | Leotiomicetes | Helotiales |
|                         |              | <i>Sclerotinia sclerotiorum ourmia-like virus 14</i>        | 3368 nt  | ssRNA   | 2021 | <i>Sclerotinia sclerotiorum</i> | Sclerotiniaceae | <i>Sclerotinia</i> | <a href="#">MT646410</a>  | FUNGI | Ascomycota | Leotiomicetes | Helotiales |
|                         |              | <i>Sclerotinia sclerotiorum ourmia-like virus 15</i>        | 3210 nt  | ssRNA   | 2021 | <i>Sclerotinia sclerotiorum</i> | Sclerotiniaceae | <i>Sclerotinia</i> | <a href="#">MT646399</a>  | FUNGI | Ascomycota | Leotiomicetes | Helotiales |
|                         |              | <i>Sclerotinia sclerotiorum ourmia-like virus 16</i>        | 2416 nt  | ssRNA   | 2021 | <i>Sclerotinia sclerotiorum</i> | Sclerotiniaceae | <i>Sclerotinia</i> | <a href="#">MT646382</a>  | FUNGI | Ascomycota | Leotiomicetes | Helotiales |
|                         |              | <i>Sclerotinia sclerotiorum ourmia-like virus 5</i>         | 2823 nt  | ssRNA   | 2021 | <i>Sclerotinia sclerotiorum</i> | Sclerotiniaceae | <i>Sclerotinia</i> | <a href="#">MT706022</a>  | FUNGI | Ascomycota | Leotiomicetes | Helotiales |
| <b>Rhabdoviridae</b>    | Not assigned | <i>Sclerotinia sclerotiorum rhabdovirus 1</i>               | 11356 nt | ssRNA - | 2021 | <i>Sclerotinia sclerotiorum</i> | Sclerotiniaceae | <i>Sclerotinia</i> | <a href="#">MT706019</a>  | FUNGI | Ascomycota | Leotiomicetes | Helotiales |
| <b>Bovinebarnavirus</b> | Not assigned | <i>Sclerotinia sclerotiorum bovinebarnavirus 1 - SCH941</i> | 6457 nt  | dsRNA   | 2015 | <i>Sclerotinia sclerotiorum</i> | Sclerotiniaceae | <i>Sclerotinia</i> | <a href="#">NC_027138</a> | FUNGI | Ascomycota | Leotiomicetes | Helotiales |
|                         |              | <i>Sclerotinia sclerotiorum bovinebarnavirus 2 - AH16</i>   | 6159 nt  | dsRNA   | 2016 | <i>Sclerotinia sclerotiorum</i> | Sclerotiniaceae | <i>Sclerotinia</i> | <a href="#">KT962972</a>  | FUNGI | Ascomycota | Leotiomicetes | Helotiales |
|                         |              | <i>Sclerotinia sclerotiorum bovinebarnavirus 3- SZ150</i>   | 6212 nt  | dsRNA   | 2018 | <i>Sclerotinia sclerotiorum</i> | Sclerotiniaceae | <i>Sclerotinia</i> | <a href="#">MK530703</a>  | FUNGI | Ascomycota | Leotiomicetes | Helotiales |

|                           |              |                                                       |          |        |      |                                 |                 |                    |                          |       |            |               |            |
|---------------------------|--------------|-------------------------------------------------------|----------|--------|------|---------------------------------|-----------------|--------------------|--------------------------|-------|------------|---------------|------------|
|                           |              | <i>Sclerotinia sclerotiorum</i> botybirnavirus 1-WX   | 6469 nt  | dsRNA  | 2021 | <i>Sclerotinia sclerotiorum</i> | Sclerotiniaceae | <i>Sclerotinia</i> | <a href="#">MT646397</a> | FUNGI | Ascomycota | Leotiomycetes | Helotiales |
|                           |              | <i>Sclerotinia sclerotiorum</i> botybirnavirus 2-WX   | 6119 nt  | dsRNA  | 2021 | <i>Sclerotinia sclerotiorum</i> | Sclerotiniaceae | <i>Sclerotinia</i> | <a href="#">MT646423</a> | FUNGI | Ascomycota | Leotiomycetes | Helotiales |
|                           |              | <i>Sclerotinia sclerotiorum</i> botybirnavirus 3-WX   | 6201 nt  | dsRNA  | 2021 | <i>Sclerotinia sclerotiorum</i> | Sclerotiniaceae | <i>Sclerotinia</i> | <a href="#">MT646418</a> | FUNGI | Ascomycota | Leotiomycetes | Helotiales |
|                           |              | <i>Sclerotinia sclerotiorum</i> botybirnavirus 4      | 6414 nt  | dsRNA  | 2021 | <i>Sclerotinia sclerotiorum</i> | Sclerotiniaceae | <i>Sclerotinia</i> | <a href="#">MT646360</a> | FUNGI | Ascomycota | Leotiomycetes | Helotiales |
|                           |              | <i>Sclerotinia sclerotiorum</i> botybirnavirus 3 S1   | 6214 nt  | dsRNA  | 2021 | <i>Sclerotinia sclerotiorum</i> | Sclerotiniaceae | <i>Sclerotinia</i> | <a href="#">MT829323</a> | FUNGI | Ascomycota | Leotiomycetes | Helotiales |
|                           |              | <i>Sclerotinia sclerotiorum</i> botybirnavirus 3 S2   | 12631 nt | dsRNA  | 2021 | <i>Sclerotinia sclerotiorum</i> | Sclerotiniaceae | <i>Sclerotinia</i> | <a href="#">MT829324</a> | FUNGI | Ascomycota | Leotiomycetes | Helotiales |
| <i>Tymoviridae</i>        | Not assigned | <i>Sclerotinia sclerotiorum</i> mycotymovirus 1-WX    | 7320 nt  | ssRNA  | 2021 | <i>Sclerotinia sclerotiorum</i> | Sclerotiniaceae | <i>Sclerotinia</i> | <a href="#">MT646427</a> | FUNGI | Ascomycota | Leotiomycetes | Helotiales |
|                           |              | <i>Sclerotinia sclerotiorum</i> mycotymovirus 1       | 6414 nt  | ssRNA  | 2021 | <i>Sclerotinia sclerotiorum</i> | Sclerotiniaceae | <i>Sclerotinia</i> | <a href="#">MK530705</a> | FUNGI | Ascomycota | Leotiomycetes | Helotiales |
| <i>Fusagranitidae</i>     | Not assigned | <i>Sclerotinia sclerotiorum</i> fusagravirus 1        | 9018 nt  | dsRNA  | 2021 | <i>Sclerotinia sclerotiorum</i> | Sclerotiniaceae | <i>Sclerotinia</i> | <a href="#">MT646357</a> | FUNGI | Ascomycota | Leotiomycetes | Helotiales |
|                           |              | <i>Sclerotinia sclerotiorum</i> fusagravirus 2        | 9001 nt  | dsRNA  | 2021 | <i>Sclerotinia sclerotiorum</i> | Sclerotiniaceae | <i>Sclerotinia</i> | <a href="#">MT646358</a> | FUNGI | Ascomycota | Leotiomycetes | Helotiales |
|                           |              | <i>Sclerotinia sclerotiorum</i> dsRNA mycovirus-L-WX1 | 9095 nt  | dsRNA  | 2021 | <i>Sclerotinia sclerotiorum</i> | Sclerotiniaceae | <i>Sclerotinia</i> | <a href="#">MT646387</a> | FUNGI | Ascomycota | Leotiomycetes | Helotiales |
|                           |              | <i>Sclerotinia sclerotiorum</i> dsRNA mycovirus-L-WX2 | 9097 nt  | dsRNA  | 2021 | <i>Sclerotinia sclerotiorum</i> | Sclerotiniaceae | <i>Sclerotinia</i> | <a href="#">MT646415</a> | FUNGI | Ascomycota | Leotiomycetes | Helotiales |
| <i>Sclerobunyaviridae</i> | Not assigned | <i>Sclerotinia sclerotiorum</i> bunyavirus 1          |          | ssRNA- | 2021 | <i>Sclerotinia sclerotiorum</i> | Sclerotiniaceae | <i>Sclerotinia</i> | **                       | FUNGI | Ascomycota | Leotiomycetes | Helotiales |
|                           |              | <i>Sclerotinia sclerotiorum</i> bunyavirus 2          | 8062 nt  | ssRNA- | 2021 | <i>Sclerotinia sclerotiorum</i> | Sclerotiniaceae | <i>Sclerotinia</i> | <a href="#">MT646359</a> | FUNGI | Ascomycota | Leotiomycetes | Helotiales |
|                           |              | <i>Sclerotinia sclerotiorum</i> bunyavirus 3          | 7707 nt  | ssRNA- | 2021 | <i>Sclerotinia sclerotiorum</i> | Sclerotiniaceae | <i>Sclerotinia</i> | <a href="#">MT646391</a> | FUNGI | Ascomycota | Leotiomycetes | Helotiales |



|                                                 |         |       |      |                                 |                 |                    |                          |       |            |                 |             |
|-------------------------------------------------|---------|-------|------|---------------------------------|-----------------|--------------------|--------------------------|-------|------------|-----------------|-------------|
| Sclerotinia sclerotiorum umbra-like virus 3-WX2 | 3945 nt | ssRNA | 2021 | <i>Sclerotinia sclerotiorum</i> | Sclerotiniaceae | <i>Sclerotinia</i> | <a href="#">MT646364</a> | FUNGI | Ascomycota | Leotiomicetes   | Helotiales  |
| Hubei sclerotinia RNA virus 1-WX                | 4222 nt | ssRNA | 2021 | <i>Sclerotinia sclerotiorum</i> | Sclerotiniaceae | <i>Sclerotinia</i> | <a href="#">MT646396</a> | FUNGI | Ascomycota | Leotiomicetes   | Helotiales  |
| Sclerotinia sclerotiorum RNA virus L-WX         | 2746 nt | ssRNA | 2021 | <i>Sclerotinia sclerotiorum</i> | Sclerotiniaceae | <i>Sclerotinia</i> | <a href="#">MT646376</a> | FUNGI | Ascomycota | Leotiomicetes   | Helotiales  |
| Sclerotinia sclerotiorum fusarivirus 2          | 6281 nt | ssRNA | 2021 | <i>Sclerotinia sclerotiorum</i> | Sclerotiniaceae | <i>Sclerotinia</i> | <a href="#">MT646393</a> | FUNGI | Ascomycota | Leotiomicetes   | Helotiales  |
| Penicillium miczynskii RNA virus 1              | 2891 nt | dsRNA | 2019 | Penicillium miczynskii          | Trichocomaceae  | Penicillium        | <a href="#">MK584820</a> | FUNGI | Ascomycota | Eurotiomycetes  | Eurotiales  |
| Fusarium culmorum virus 1                       | 2898 nt | dsRNA | 2020 | Fusarium culmorum               | Nectriaceae     | <i>Fusarium</i>    | <a href="#">MN187541</a> | FUNGI | Ascomycota | Sordariomycetes | Hypocreales |

\*\* Without access to GenBank

**Supplementary Table S2.** Mycoviruses genomic information: genome size, ORF prediction, conserved domains, and probable genetic code.

| Family                   | Genome size (Kb) | Segments | Genes that encode                                              | Reference studies                                                                                                               | Genome type | Reference                   |
|--------------------------|------------------|----------|----------------------------------------------------------------|---------------------------------------------------------------------------------------------------------------------------------|-------------|-----------------------------|
| <i>Partitiviridae</i>    | 3 - 4.8          | 2        | RdRp, CP                                                       | Biocontrol<br>Vainio et al., 2017                                                                                               | dsRNA       | Nibert et al., 2013         |
| <i>Chrysoviridae</i>     | 8.9 - 16         | 4        | RdRp, CP, P3, P5                                               | Associated with hypovirulence, application not developed.<br>Ejmal et al., 2018; Jamal et al., 2010; Torres-Trenas et al., 2019 | dsRNA       | Kotta-Loizou & Coutts, 2017 |
| <i>Hypoviridae</i>       | 9 - 13           | 1        | RdRp                                                           | Associated with hypovirulence, application not developed. Choi et al., 2012                                                     | ssRNA+      | Picarelli et al., 2019      |
| <i>Reoviridae</i>        | 18,2 - 30,5      | 10 - 12  | Vp1 pol, VP2, VP3, VP4, NSp1, VP6, NSp3, NSp2, VP7, NSp4, NSp5 | Study of proteins associated with signs<br>Kanematsu et al., 2010                                                               | dsRNA       | J. Wang et al., 2015        |
| <i>Totiviridae</i>       | 4,6 - 7          | 1        | RdRp, CP                                                       | protein study<br>Chiba et al., 2013; Kotta-Loizou et al., 2020; Lukša et al., 2017                                              | dsRNA       | Kartali et al., 2019        |
| <i>Endornaviridae</i>    | 14 - 17,6        | 1        | RdRp                                                           | transmission mechanisms<br>Revill et al., 1994                                                                                  | dsRNA       | Rossmann et al., 2021       |
| <i>Alphaflexiviridae</i> | 5,5 - 9          | 1        | RdRp, CP, TGB1, TGB3                                           | N/A                                                                                                                             | ssRNA+      | Kreuze et al., 2020         |
| <i>Betaflexiviridae</i>  | 6,5 - 9          | 1        | RdRp, CP, TGB1, TGB3                                           | N/A                                                                                                                             | ssRNA+      | Kreuze et al., 2020         |
| <i>Gammaflexiviridae</i> | 6,8              | 1        | RdRp, CP                                                       | N/A                                                                                                                             | ssRNA+      | Picarelli et al., 2019      |
| <i>Deltaflexiviridae</i> | 6 - 8            | 1        | RdRp, poliproteinas                                            | N/A                                                                                                                             | ssRNA+      | Hamid et al., 2018          |
| <i>Barnaviridae</i>      | 4                | 1        | RdRp, CP, poliproteinas                                        | N/A                                                                                                                             | ssRNA+      | Marzano et al., 2016        |
| <i>Narnaviridae</i>      | 2,5 - 2,9        | 1        | RdRp                                                           | N/A                                                                                                                             | ssRNA+      | Marzano et al., 2016        |
| <i>Pseudoviridae</i>     | --               | 1        | --                                                             | N/A                                                                                                                             | ssRNA+      | Koch et al., 2021           |
| <i>Metaviridae</i>       | 3 - 15           | 1        | RdRp, CP, NC                                                   | N/A                                                                                                                             | ssDNA+      | Jacquat et al., 2020        |
| <i>Mymonaviridae</i>     | 10               | 1        | poliproteinas                                                  | transmission mechanisms<br>Magae, 2012                                                                                          | ssRNA-      | Picarelli et al., 2019      |
| <i>Phenuiviridae</i>     | 1,7 - 6,4        | 3        | N, NS, poliproteinas                                           | N/A                                                                                                                             | ssRNA-+     | Guo et al., 2021            |
| <i>Quadriviridae</i>     | 16,8             | 4        | P2, RdRp, P4                                                   | N/A                                                                                                                             | dsRNA       | Picarelli et al., 2019      |

|                           |         |       |                 |     |         |                                         |
|---------------------------|---------|-------|-----------------|-----|---------|-----------------------------------------|
| <b>Megabirnaviridae</b>   | 7 - 9   | 2     | CP, RdRp        | N/A | dsRNA   | Sato et al., 2019                       |
| <b>Botourmiaviridae</b>   | 23,8    | 1 - 2 | CP, RdRp        | N/A | ssRNA+  | Linnakoski et al., 2021                 |
| <b>Rhabdoviridae</b>      | 11 - 15 | 2     | poliproteinas   | N/A | ssRNA - | Walker et al., 2018;<br>Mu et al., 2021 |
| <b>Tymoviridae</b>        | 6 - 7,5 | 1     | poliprotein     | MA  | ssRNA+  | Martelli et al., 2002                   |
| <i>Amalgaviridae</i>      | --      | --    | --              | N/A | dsRNA   | Zhu et al., 2021                        |
| <i>Curvulaviridae</i>     | --      | --    | --              | N/A | dsRNA   | Zhu et al., 2021                        |
| <i>Mitoviridae</i>        | --      | --    | --              | N/A | dsRNA   | Jacquat et al., 2020                    |
| <b>Botybirnavirus</b>     | --      | --    | --              | NA  | dsRNA   | Ruiz-Padilla et al.,<br>2021            |
| <b>Fusagraviridae</b>     | --      | --    | --              | NA  | dsRNA   | Jacquat et al., 2020                    |
| <b>Sclerobunyaviridae</b> | --      | --    | --              | NA  | ssRNA-  | Sutela et al., 2020                     |
| <i>Polymycoviridae</i>    | --      | --    | --              | N/A | dsRNA   | Zhu et al., 2021                        |
| <b>Mycoaspiviridae</b>    | --      | --    | --              | NA  | ssRNA-  | Rumbou et al., 2021                     |
| <b>Genomoviridae</b>      | 2.17    | 1     | CP, polyprotein | NA  | ssDNA   | Fu et al., 2022                         |

\*\* RdRp – RNA-dependent RNA Polymerase; CP – Capsid Protein, NC – Nucleocapside, P3 – polymerase, P5 – promoting region, Vp1 pol, polymerase RdRp; VP2 – capsular protein; VP3 – nucleus capsid,- VP4- enzyme (guanylyl-transferase); NSp1, non-structural (associated with microtubule formation); VP6 - Helicase, NTPase NSp3 - variable proteins (associated with virulence); NSp2 - RNA binding associated with the outer capsid; VP7 – formation of the nucleus; NSp4 - transmembrane glycoprotein NSp5- microtubule formation; TGB1 –  $\beta$ b; TGB3 -  $\beta$ c (associated with the membrane); N – Nucleocapside; NS - non-structural proteins

**Supplementary Table S3.** Information about phytopathogenic fungal species described to be infected by viruses and their hosts.

| Fungal Family            | Fungal specie                                                                                                                     | Plant              | Author                    |
|--------------------------|-----------------------------------------------------------------------------------------------------------------------------------|--------------------|---------------------------|
| <i>Meruliaceae</i>       | <i>Chondrostereum purpureum</i>                                                                                                   | Rose               | Francia., et al 2017      |
| <i>Meruliaceae</i>       | <i>Chondrostereum purpureum</i>                                                                                                   | Plum               | Bus., et al 1998          |
| <i>Meruliaceae</i>       | <i>Chondrostereum purpureum</i>                                                                                                   | Cherry             | Børve J., et al 2017      |
| <i>Meruliaceae</i>       | <i>Chondrostereum purpureum</i>                                                                                                   | Peach              | Grinbergs., et all 2021   |
| <i>Meruliaceae</i>       | <i>Chondrostereum purpureum</i>                                                                                                   | Apple tree         | Ozgonen H., et al 2006    |
| <i>Meruliaceae</i>       | <i>Chondrostereum purpureum</i>                                                                                                   | Almond             | Grinbergs., et all 2020   |
| <i>Platyglloeaceae</i>   | <i>Helicobasidium mompa</i>                                                                                                       | Potato             | Hong., et al 2011         |
| <i>Bondarzewiaceae</i>   | <i>Heterobasidion</i> sp., <i>Heterobasidion ecrustosum</i> , <i>Heterobasidion annosum</i> , <i>Heterobasidion parviporum</i> .  | Conifers           | Yuan., et al 2021         |
| <i>Bondarzewiaceae</i>   | <i>Heterobasidion</i> sp., <i>Heterobasidion ecrustosum</i> , <i>Heterobasidion annosum</i> , <i>Heterobasidion parviporum</i> .  | Firs               | Yuan., et al 2022         |
| <i>Xylariaceae</i>       | <i>rosellinia necatrix</i>                                                                                                        | Lenhosous species  | Pliego., et al 2012       |
| <i>Xylariaceae</i>       | <i>rosellinia necatrix</i>                                                                                                        | Semi-woody species | Pliego., et al 2012       |
| <i>Xylariaceae</i>       | <i>rosellinia necatrix</i>                                                                                                        | Ornamental species | Pliego., et al 2012       |
| <i>Clavivipitaceae</i>   | <i>Atkinsonella hypoxylon</i>                                                                                                     | Pastures           | Clay K. 1984              |
| <i>Clavivipitaceae</i>   | <i>Atkinsonella hypoxylon</i>                                                                                                     | Junco              | Clay K. 1984              |
| <i>Ceratocystidaceae</i> | <i>Endoconidiophora resinifera</i>                                                                                                | Conifers           | Zubaer., et al 2018       |
| <i>Nectriaceae</i>       | <i>Fusarium poae</i>                                                                                                              | Cereal             | Gil-Serna., et al 2014    |
| <i>Agonomisetaceae</i>   | <i>Rhizoctonia solani</i>                                                                                                         | Cereal             | Wallon., et al 2020       |
| <i>Agonomisetaceae</i>   | <i>Rhizoctonia solani</i>                                                                                                         | Vegetables         | Kuramae., et al 2003      |
| <i>Agonomisetaceae</i>   | <i>Rhizoctonia solani</i>                                                                                                         | Coffee             | Kuramae., et al 2004      |
| <i>Valseaceae</i>        | <i>Discula destructiva</i>                                                                                                        | Dogwood trees      | Mantooth et al, 2017      |
| <i>Nectriaceae</i>       | <i>Fusarium solani</i> , <i>haematococca</i> , <i>fusarium silvicola</i>                                                          | Conifers           | Šišić et al, 2018         |
| <i>Helotiaceae</i>       | <i>Gremmeniella abietina</i>                                                                                                      | Conifers           | Botella and hantula, 2018 |
| <i>Trichocomaceae</i>    | <i>Penicillium stoloniferum</i> , <i>penicillium brevicompactum</i> , <i>aspergillus ochraceus</i>                                | Apples             | Detroy and still, 1974    |
| <i>Trichocomaceae</i>    | <i>Penicillium stoloniferum</i> , <i>penicillium brevicompactum</i> , <i>aspergillus ochraceus</i> , <i>Aspergillus fumigatus</i> | Mushrooms          | Detroy and still, 1974    |
| <i>Trichocomaceae</i>    | <i>Penicillium stoloniferum</i> , <i>penicillium brevicompactum</i> , <i>aspergillus ochraceus</i> , <i>Aspergillus fumigatus</i> | Ginger             | Detroy and still, 1974    |

| Fungal Family             | Fungal specie                                                                                              | Plant                                                                                          | Author                       |
|---------------------------|------------------------------------------------------------------------------------------------------------|------------------------------------------------------------------------------------------------|------------------------------|
| <i>Trichocomaceae</i>     | <i>Penicillium stoloniferum, penicillium brevicompactum, aspergillus ochraceus , Aspergillus fumigatus</i> | Avocado                                                                                        | Detroy and still, 1974       |
| <i>Glomerellaceae</i>     | <i>Colletotrichum gloeosporioides</i>                                                                      | Quercus                                                                                        | Choub et al 2021             |
| <i>Glomerellaceae</i>     | <i>Colletotrichum gloeosporioides</i>                                                                      | Cassava                                                                                        | Choub et al 2021             |
| <i>Glomerellaceae</i>     | <i>Colletotrichum gloeosporioides</i>                                                                      | Peach                                                                                          | Liang et al 2021             |
| <i>Glomerellaceae</i>     | <i>Colletotrichum gloeosporioides</i>                                                                      | Pear                                                                                           | Wang et al 2021              |
| <i>Glomerellaceae</i>     | <i>Colletotrichum gloeosporioides</i>                                                                      | Auchuba                                                                                        | Liang et al 2021             |
| <i>Glomerellaceae</i>     | <i>Colletotrichum gloeosporioides</i>                                                                      | Papaya                                                                                         | Wang et al 2021              |
| <i>Glomerellaceae</i>     | <i>Colletotrichum gloeosporioides</i>                                                                      | Melon                                                                                          | Liang et al 2021             |
| <i>Glomerellaceae</i>     | <i>Colletotrichum gloeosporioides</i>                                                                      | Tobacco                                                                                        | Choub et al 2021             |
| <i>Cryphonectriaceae</i>  | <i>Cryphonectria nitschkei</i>                                                                             | Bulbs                                                                                          | shahi et al 2020             |
| <i>Cryphonectriaceae</i>  | <i>Cryphonectria nitschkei</i>                                                                             | Tomato                                                                                         | shahi et al 2020             |
| <i>Cryphonectriaceae</i>  | <i>Cryphonectria nitschkei</i>                                                                             | Carnation                                                                                      | shahi et al 2020             |
| <i>Cryphonectriaceae</i>  | <i>Cryphonectria nitschkei</i>                                                                             | Chrysanthemums                                                                                 | shahi et al 2020             |
| <i>Nectriaceae</i>        | <i>Fusarium oxysporum</i>                                                                                  | Wheat                                                                                          | Jangir et al 2021            |
| <i>Nectriaceae</i>        | <i>Fusarium oxysporum</i>                                                                                  | Oatmeal                                                                                        | Jangir et al 2021            |
| <i>Nectriaceae</i>        | <i>Fusarium oxysporum</i>                                                                                  | Corn                                                                                           | Jangir et al 2021            |
| <i>Pleosporaceae</i>      | <i>Helminthosporium victoriae</i>                                                                          | Cereal                                                                                         | Soldevila and Ghabrial, 2000 |
| <i>Pleosporaceae</i>      | <i>Helminthosporium victoriae</i>                                                                          | Tomato                                                                                         | Li et al 2011                |
| <i>Pleosporaceae</i>      | <i>Helminthosporium victoriae</i>                                                                          | Wheat                                                                                          | Huang and Ghabrial, 1996     |
| <i>Pleosporaceae</i>      | <i>Helminthosporium victoriae</i>                                                                          | Papaya                                                                                         | Soldevila and Ghabrial, 2000 |
| <i>Botryosphaeriaceae</i> | <i>Macrophomina phaseolina</i>                                                                             | , SesameMani, Cabbage, Pepper, Chickpea, Soy, Sunflower, Sweet Potato, Alfalfa, Potato, Tomato | Marquez et al 2021           |
| <i>Incertae</i>           | <i>Verticillium Dahliae, Fusarium graminearum, Fuarium oxysporum</i>                                       | Sunflower                                                                                      | Martin-Sanz et al 2018       |
| <i>Incertae</i>           | <i>Verticillium Dahliae, Fusarium graminearum, Fuarium oxysporum</i>                                       | Cauliflower                                                                                    | Bhat and Subbarao, 1999      |
| <i>Incertae</i>           | <i>Verticillium Dahliae, Fusarium graminearum, Fuarium oxysporum</i>                                       | Cotton                                                                                         | Li et al 2019                |
| <i>Incertae</i>           | <i>Verticillium Dahliae, Fusarium graminearum, Fuarium oxysporum</i>                                       | Lettuce                                                                                        | Woolliams, 1966              |
| <i>Incertae</i>           | <i>Verticillium Dahliae, Fusarium graminearum, Fuarium oxysporum</i>                                       | Olive                                                                                          | Jiménez-Ruiz et al 2019      |

| Fungal Family             | Fungal specie                                                        | Plant                                                                                                                                                         | Author                     |
|---------------------------|----------------------------------------------------------------------|---------------------------------------------------------------------------------------------------------------------------------------------------------------|----------------------------|
| <i>Incertae</i>           | <i>Verticillium Dahliae, Fusarium graminearum, Fuarium oxysporum</i> | Potato                                                                                                                                                        | Song et al 2020            |
| <i>Incertae</i>           | <i>Verticillium Dahliae, Fusarium graminearum, Fuarium oxysporum</i> | Tobacco                                                                                                                                                       | Song et al 2020            |
| <i>Incertae</i>           | <i>Verticillium Dahliae, Fusarium graminearum, Fuarium oxysporum</i> | Tomato                                                                                                                                                        | Acharya et al 2020         |
| <i>Melanconidaceae</i>    | <i>Coniella diplodiella</i>                                          | Grape                                                                                                                                                         | Liu et al 2020             |
| <i>Pleosporaceae</i>      | <i>alternaria alternata</i>                                          | Tomato, Wheat, Papaya                                                                                                                                         | López Couso et al 2021     |
| <i>Magnaporthaceae</i>    | <i>Magnaporthe oryzae</i>                                            | Rice                                                                                                                                                          | Sella et al 2021           |
| <i>Botryosphaeriaceae</i> | <i>Neofusicoccum parvum</i>                                          | Grape, Mango, Olive, Eucalyptus, Maple, Oak                                                                                                                   | Leal et al 2021            |
| <i>Typhulaceae</i>        | <i>Sclerotium hydrophilum</i>                                        | Rice                                                                                                                                                          | Gutiérrez, 2007            |
| <i>Sclerotiniaceae</i>    | <i>Sclerotinia sclerotiorum</i>                                      | Potato, Beans, Lettuce, Tomato, Celery, Cauliflower, Cabbage, Carrot, Grape                                                                                   | Xia et al 2020             |
| <i>Cryphonectriaceae</i>  | <i>Cryphonectria parasitica</i>                                      | Quercus                                                                                                                                                       | Rigling and Prospero, 2018 |
| <i>Ustilaginaceae</i>     | <i>Ustilago maydis</i>                                               | Corn                                                                                                                                                          | Kretschmer et al 2017      |
| <i>Ceratocystidaceae</i>  | <i>Berkeleyomyces basicola</i>                                       | Alfalfa                                                                                                                                                       | Gonçalves Silva et al 2021 |
| <i>Ceratocystidaceae</i>  | <i>Berkeleyomyces basicola</i>                                       | African daisy, Carrot, Chickpea, Citrus, Catton, Curcubetaceae, Line, Geranium, Lentils, Green peas, Peanut, Poinsettia, Red clover, Tobacco, Tomato, Verbena | Trojak-Goluch et al 2016   |
| <i>Pleosporaceae</i>      | <i>Bipolaris victoriae</i>                                           | Cereal                                                                                                                                                        | García-León et al 2013     |
| <i>Botryosphaeriaceae</i> | <i>Diplodia sapinea</i>                                              | Conifers                                                                                                                                                      | Van der Nest et al 2014    |
| <i>Erysiphaceae</i>       | <i>Golovinomyces cichoracearum</i>                                   | Melon                                                                                                                                                         | Delhey et al 2003          |
| <i>Erysiphaceae</i>       | <i>Golovinomyces cichoracearum</i>                                   | Cucumber                                                                                                                                                      | Cortez, 2008               |
| <i>Erysiphaceae</i>       | <i>Golovinomyces cichoracearum</i>                                   | Pumpkin                                                                                                                                                       | Delhey et al 2004          |
| <i>Pleosporaceae</i>      | <i>Alternaria brassicicola</i>                                       | Chinese cabbage, Pak choi                                                                                                                                     | Calmes et al 2015          |
| <i>Nectriaceae</i>        | <i>Fusarium redolens</i>                                             | Wheat, Barley                                                                                                                                                 | Ölmez and Tunali, 2019     |
| <i>Marasmiaceae</i>       | <i>Moniliophthora sp.</i>                                            | Cocoa                                                                                                                                                         | Barbosa et al 2018         |
| <i>Davidiellaceae</i>     | <i>Phoma sp.</i>                                                     | Tomato                                                                                                                                                        | Chen et al 2015            |
| <i>Davidiellaceae</i>     | <i>Cladosporium fulvum</i>                                           | Tomato                                                                                                                                                        | Wit et al 2012             |
| <i>Botryosphaeriaceae</i> | <i>Botryosphaeria dothidea</i>                                       | Grape, Mango, Olive, Eucalyptus, Maple, Oak                                                                                                                   | Dong and Gou, 2020         |

| Fungal Family             | Fungal specie                      | Plant       | Author            |
|---------------------------|------------------------------------|-------------|-------------------|
| <i>Glomerellaceae</i>     | <i>Colletotrichum camelliae</i>    | Tea         | Wang et al 2016   |
| <i>Botryosphaeriaceae</i> | <i>Neofusicoccum sp</i>            | Eucalyptus  | Marais et al 2021 |
| <i>Glomerellacea</i>      | <i>Colletotrichum higginsianum</i> | Arabidopsis | Korn et al 2015   |
